# Supplementary material
Source: Elsevier journal article supplement (https://www.sciencedirect.com/science/article/pii/S0300289615001568)
Supplement: mmc1 [file S0300289615001568:mmc1.pdf]

## **Normativa SEPAR**

### **NORMATIVA SEPAR SOBRE DISFUNCIÓN MUSCULAR DE LOS PACIENTES CON ENFERMEDAD PULMONAR OBSTRUCTIVA CRÓNICA**

#### **Autores:**

<sup>1,2</sup>Esther Barreiro, <sup>3,4</sup>Víctor Bustamante, <sup>4</sup>Pilar Cejudo, <sup>2,3</sup>Juan B. Gáldiz,  
<sup>1,2</sup>Joaquim Gea, <sup>5</sup>Pilar de Lucas, <sup>1,2</sup>Juana Martínez-Llorens, <sup>2,4</sup>Francisco  
Ortega, <sup>5</sup>Luis Puente-Maestu, <sup>2,6</sup>Josep Roca, <sup>5</sup>José Miguel Rodríguez-González  
Moro

<sup>1</sup>*Servei de Pneumologia, Unitat de Recerca en Múscul i Aparell Respiratori (URMAR), IMIM-Hospital del Mar, CEXS, Universitat Pompeu Fabra, Parc de Recerca Biomèdica de Barcelona (PRBB), Dr. Aiguader, 88, 08003 Barcelona.*

<sup>2</sup>CIBER de Enfermedades Respiratorias (CIBERES), Instituto de Salud Carlos III, Madrid.

<sup>3</sup>Hospital Universitario Basurto, Osakidetza. Departamento de Medicina. Universidad del País Vasco. Avenida de Montevideo 18, 48013 Bilbao, Bizkaia.

<sup>4</sup>Servicio de Neumología y Unidad de Investigación, Hospital de Cruces, Universidad del País Vasco, Plaza Cruces s/n, 48903 Barakaldo, Bizkaia.

<sup>5</sup>Unidad Médico-Quirúrgica de Enfermedades Respiratorias, Hospital Universitario Virgen del Rocío, Avenida Manuel Siurot s/n, 41013 Sevilla.

<sup>6</sup>Servicio de Neumología, Hospital General Gregorio Marañón, Universidad Complutense de Madrid, C/ Dr. Esquerdo, 46, 28007 Madrid.

<sup>7</sup>*Servei de Pneumologia, Hospital Clínic de Barcelona, Villarroel, 170, 08036 Barcelona.*

## RESUMEN

La disfunción muscular (DM) de pacientes con Enfermedad Pulmonar Obstructiva Crónica (EPOC) constituye una de las comorbilidades más importantes, con repercusiones negativas en su capacidad de ejercicio y calidad de vida. En la presente normativa se ha resumido la literatura publicada más recientemente sobre los diferentes aspectos del tema y se ha utilizado también la escala GRADE (*Grading of Recommendations Assessment, Development, and Evaluation*) de recomendaciones sobre el grado de evidencia de las diferentes propuestas de la normativa. Respecto a una población control, se estima que en un tercio de los pacientes EPOC, la fuerza del cuádriceps es un 25% inferior incluso en estadios precoces de su enfermedad. Aunque tanto los músculos respiratorios como los de las extremidades están alterados, estos últimos suelen verse mayormente afectados. Diversos factores y mecanismos biológicos están involucrados en la DM de los pacientes. Se proponen diversas pruebas para evaluar y diagnosticar el grado de afectación de los músculos respiratorios y de las extremidades (periféricos), así como identificar la capacidad de esfuerzo de los pacientes (prueba de marcha de 6 minutos y cicloergometría). Se describen también las posibles estrategias terapéuticas vigentes que incluyen las diversas modalidades de entrenamiento, y de soporte farmacológico y nutricional.

## **RECOMMENDATIONS FOR THE EVALUATION AND TREATMENT OF MUSCLE DYSFUNCTION IN PATIENTS WITH CHRONIC OBSTRUCTIVE PULMONARY DISEASE**

In patients with chronic obstructive pulmonary disease (COPD), skeletal muscle dysfunction is a major comorbidity that negatively impacts their exercise capacity and quality of life. In the current guidelines, the most recent literature on the various aspects of COPD muscle dysfunction has been included. The Grading of Recommendations, Assessment, Development, and Evaluation (GRADE) scale has been used to make evidence-based recommendations on the different features. Compared to a control population, one third of COPD patients exhibited a 25% decline in quadriceps muscle strength, even at early stages of their disease. Although both respiratory and limb muscles are altered, the latter are usually more severely affected. Numerous factors and biological mechanisms are involved in the etiology of COPD muscle dysfunction. Several tests are proposed in order to diagnose and evaluate the degree of muscle dysfunction of both respiratory and limb muscles (peripheral), as well as to identify the patients' exercise capacity (six-minute walking test and cycloergometry). Currently available therapeutic strategies including the different training modalities and pharmacological and nutritional support are also described.

## **ABREVIATURAS**

**ATP:** Adenosín trifosfato

**ATS:** Sociedad torácica americana

**BIA:** Análisis de la bioimpedancia

**BMI:** Índice de masa corporal

**BODE:** Acrónimo derivado de Body mass index, Airflow Obstruction, Dyspnea, y Exercise capacity

**DEXA:** Absorciometría de rayos X

**DM:** Disfunción muscular

**EET:** Estimulación eléctrica transcutánea

**EMG:** Electromiografía

**EMI:** Entrenamiento muscular inspiratorio

**EPOC:** Enfermedad pulmonar obstructiva crónica

**ERS:** Sociedad europea respiratoria

**FEV<sub>1</sub>:** Volumen forzado espiratorio en el primer segundo

**FFM:** Masa libre de grasa

**FRC:** Capacidad funcional residual

**FVC:** Capacidad vital forzada

**GH:** Hormona del crecimiento

**IGF:** Factor de crecimiento insulínico

**MCV:** Contracción isométrica voluntaria máxima

**MET:** Tasa metabólica equivalente

**MM:** Masa muscular

**MMII:** Músculos de miembros inferiores

**MMSS:** Músculos de miembros superiores

**MSV:** Ventilación máxima sostenible

**MyoD:** Proteína 1 de la diferenciación miogénica

**PCIA:** Potencia constante de intensidad alta

**Pdi:** Presión transdiafragmática

**Pdimax:** Presión transdiafragmática máxima

**Pditwitch:** Presión transdiafragmática inducida por estimulación

**PEM:** Presión espiratoria máxima

**PIM:** Presión inspiratoria máxima

**PTP:** Producto presión/tiempo

**Q-CMV:** Contracción isométrica máxima del cuádriceps

**QTw:** Fuerza de contracción del cuádriceps

**RM:** Resonancia magnética

**RM:** Repetición máxima

**RR:** Rehabilitación respiratoria

**SniffPdi:** Presión transdiafragmática durante la inhalación forzada

**SniffPesmax:** Presión esofágica durante la inhalación forzada

**SNIP:** Presión inhalatoria nasal máxima

**TC:** Tomografía computarizada

**TLC:** Capacidad pulmonar total

**Tlim:** Tiempo límite

**VMNI:** Ventilación no invasiva

**VO2Max:** Consumo máximo de oxígeno

**RV:** Volumen residual

**VVM:** Ventilación voluntaria máxima

**WRmax:** Carga máxima en la prueba de esfuerzo

## INTRODUCCIÓN

En la presente normativa se describen los últimos avances sobre la disfunción muscular en los pacientes con enfermedad pulmonar obstructiva crónica (EPOC) por lo que respecta al problema general, la etiología, el diagnóstico, la evaluación y el tratamiento. Para ello por parte de los autores expertos se ha resumido la literatura más reciente sobre los diferentes aspectos del tema y se ha utilizado también la escala GRADE (*Grading of Recommendations Assessment, Development, and Evaluation*) de recomendaciones sobre el grado de evidencia de las diferentes propuestas de la normativa (1).

## DESCRIPCIÓN GENERAL DEL PROBLEMA, EPIDEMIOLOGÍA, FISIOPATOLOGÍA E IMPLICACIONES PARA LOS PACIENTES

Los músculos estriados son elementos contráctiles que nos permiten movilizar diferentes estructuras del organismo. Así, los músculos de las extremidades permiten la deambulación y manipulación de objetos, siendo esenciales para la autonomía y la vida de relación de los individuos. A estos músculos se les denomina generalmente como esqueléticos o “periféricos”. A su vez, existen otros músculos cuya función es generar las presiones intratorácicas necesarias para que se produzca la ventilación, denominándose por tanto músculos ventilatorios o respiratorios. Finalmente, existe un músculo altamente especializado, el cardíaco, cuya misión es proveer la perfusión de los diferentes órganos, incluyendo el pulmón. De la interacción entre la ventilación generada por los músculos respiratorios y la perfusión derivada de la contracción cardíaca derivará tanto el intercambio pulmonar de gases (misión principal del pulmón) como el aporte de éstos y su retirada de los tejidos periféricos.

Los músculos de cualquier territorio poseen dos propiedades funcionales fundamentales. La fuerza, o expresión máxima de su capacidad de contracción, y la resistencia, o capacidad de mantener en el tiempo un esfuerzo inferior al máximo (2). Ambas propiedades son importantes, aunque para tareas distintas, y cada una de ellas depende de elementos específicos. La fuerza se halla fundamentalmente en función de la masa muscular, mientras que la resistencia lo hace de la capacidad aeróbica del músculo (3). Estas dos propiedades pueden ser medidas, basándose en principios bastante similares para los diversos grupos musculares. Sin embargo, la fuerza se mide de forma más directa en los músculos de las extremidades (dinamometría), mientras que en los músculos respiratorios se determina indirectamente, a través de las presiones que éstos generan. En el caso de la resistencia, suele evaluarse en función del tiempo que un sujeto puede resistir frente a una carga submáxima (3).

Cuando un músculo no es capaz de cumplir su cometido, hablamos de disfunción muscular (2). Esta puede venir definida por déficits en la fuerza, la resistencia o ambas. Se denomina debilidad muscular al estado relativamente permanente de disfunción muscular. Su superación requiere medidas terapéuticas de medio y largo plazo (soporte nutricional, entrenamiento) (3). Por el contrario, la fatiga muscular es un estado transitorio, que revierte en un corto espacio de tiempo con el reposo (3).

La disfunción muscular, tanto de los músculos ventilatorios como de los de las extremidades, es frecuente en las enfermedades respiratorias. Cuando existe disfunción muscular en las extremidades, los pacientes pierden autonomía y ello condiciona negativamente su calidad de vida (4;5). Entran además en un



círculo de progresiva menor actividad, que acabará teniendo complicaciones múltiples y finalmente disminuirá sus expectativas de vida (5). Cuando la disfunción es ventilatoria, contribuirá también a reducir la capacidad de ejercicio del enfermo, y además dificultará la superación de sus episodios de exacerbación. Además, si precisa de ventilación mecánica, la disfunción de los músculos respiratorios dificultará extraordinariamente el proceso de desconexión (*weaning*).

La EPOC es probablemente la enfermedad respiratoria en que se ha estudiado más la disfunción muscular. Así, se ha publicado que hasta un tercio de los enfermos con EPOC, incluso en fases precoces de su enfermedad, muestran una función muscular deteriorada en sus extremidades (4). Concretamente, se demostró que en estos pacientes la fuerza del cuádriceps fue un 25% inferior a la generada por la población control del mismo estudio (4). Además se pudo demostrar que la proporción de pacientes con debilidad muscular fue similar entre los distintos países participantes, e independiente del grado de obstrucción al flujo aéreo (4). De hecho, la disfunción muscular del cuádriceps correlacionó con el índice de BODE (del inglés *body mass index, airflow obstruction, dyspnea, exercise capacity*), pero no con la limitación al flujo aéreo (4). Otros estudios han demostrado también la existencia de disfunción muscular periférica en pacientes con EPOC (6;7). La disfunción muscular respiratoria se observa en pacientes con EPOC avanzada y oscila entre 20-30% de la fuerza diafragmática desarrollada en los sujetos control (8-10).

La disfunción muscular se hallaría relacionada con la pérdida de masa muscular en un porcentaje variable de casos (fenotipo enfisematoso de bajo peso), aunque estaría motivada sobre todo por el decondicionamiento derivado

de la inactividad física (2;3). A su vez, muchos de los pacientes con EPOC mostrarían también disfunción de sus músculos respiratorios (20%-30% reducción fuerza muscular respiratoria respecto de los controles), derivada en gran medida de la hiperinsuflación pulmonar, que provoca el acortamiento del principal músculo respiratorio, el diafragma, que verá así disminuida su capacidad de generar fuerza (8;10-12).

Sin embargo, existen muchas otras enfermedades del aparato respiratorio en las cuales puede también aparecer disfunción muscular. Algunas son enfermedades fundamentalmente pulmonares, como es el caso del asma o la fibrosis intersticial. Otras afectan a elementos de la caja torácica, como es el caso de sus deformidades, o son enfermedades neuromusculares, neurológicas o sistémicas (como el cáncer y la sepsis). Finalmente, también aparece una frecuente disfunción muscular en los enfermos críticos. De forma breve, se resume la alteración muscular en todas estas entidades.

En el caso del asma bronquial, la disfunción puede aparecer como consecuencia del tratamiento esteroideo (miopatías crónica y aguda) (13) y, en el caso de los músculos respiratorios, también puede derivar de la hiperinsuflación (14). En las agudizaciones graves, la presencia de hipoxemia y acidosis puede deteriorar todavía más la función muscular, añadiéndose además una lesión estructural de las fibras, fruto del sobreesfuerzo de los músculos respiratorios (15). La fibrosis quística, acompañada de desnutrición en muchos casos, también puede cursar con disfunción muscular, en cuya etiología se han implicado además la hipoxia tisular, el decondicionamiento y el uso de esteroides (16). Por otra parte, las enfermedades intersticiales del pulmón, se acompañan de elementos comunes a la EPOC, como la escasa

actividad de los pacientes, una actividad inflamatoria persistente y cargas ventilatorias aumentadas, todos ellos factores que pueden contribuir a la disfunción muscular, tanto ventilatoria como periférica (17). La escoliosis y la cifoescoliosis también pueden condicionar alteraciones funcionales en los músculos, incluso en pacientes jóvenes (18). En este caso se han postulado dos teorías, quizás complementarias. Por un lado, la disminución de actividad física que parecen presentar estos enfermos. Por otro, se cree que en algunas de estas entidades subyace una alteración muscular primaria, cuya consecuencia sería la deformidad torácica (18). En cuanto a las enfermedades neuromusculares, las que con más frecuencia hacen acudir a los pacientes a especialistas en aparato respiratorio son probablemente la esclerosis lateral amiotrófica y otras enfermedades de la motoneurona y las miopatías, como la enfermedad de Duchenne, la distrofia miotónica y la miastenia gravis. En estos casos, la afectación muscular periférica ocurre, pero es la respiratoria la que condiciona los tratamientos de soporte ventilatorio y las posibilidades de supervivencia del paciente (19). En el caso de los procesos neurológicos, como el accidente vascular cerebral, la enfermedad de Parkinson o el síndrome de Guillain-Barré, sucede generalmente al contrario, los problemas principales suelen ser en los músculos periféricos, y sólo en un segundo plano puede aparecer un grado relevante de disfunción muscular respiratoria (19). Finalmente, existe un gran espectro de enfermedades sistémicas, que de forma más ocasional pueden generar la consulta a especialistas del aparato respiratorio por disfunción muscular. Es el caso de pacientes con miopatías inflamatorias (artritis reumatoide, lupus, dermatomiositis, etc.) (19), pero

también enfermos con largas estancias en unidades de cuidados intensivos (20) o estadios avanzados de cáncer, incluyendo el cáncer de pulmón (21).

Dado que la evidencia clínica y fisiopatológica sobre la disfunción muscular procede mayormente de los estudios publicados en pacientes con EPOC, la presente normativa se centra en la descripción de una serie de recomendaciones en esta enfermedad y no en otras, dada su escasa o nula evidencia todavía.

*Los estudios observacionales demuestran de manera consistente que los pacientes EPOC tienen disfunción muscular independientemente de la gravedad de la obstrucción pulmonar. Evidencia GRADE 1A.*

## **ETIOLOGÍA DE LA DISFUNCIÓN MUSCULAR EN LA EPOC**

En las dos últimas décadas se ha demostrado la participación de diversos factores y mecanismos en la etiología multifactorial de la disfunción muscular de pacientes con EPOC. Entre los factores más destacables se encuentran el humo del cigarrillo, la hipoxia, la hipercapnia y acidosis, alteraciones metabólicas y genéticas diversas, la presencia de comorbilidades, la malnutrición, la inflamación sistémica, las exacerbaciones y la inactividad física. Los eventos biológicos más fuertemente implicados en la etiología de esta disfunción muscular han sido ya objeto de revisión en diversas publicaciones en los últimos años (2;3;22;23), siempre a partir de trabajos originales en los que se demostró la contribución específica de cada uno de dichos mecanismos. Las alteraciones estructurales, el remodelado muscular, el estrés oxidativo, la pérdida de masa muscular, diversos procesos epigenéticos, la autofagia y las perturbaciones en el metabolismo de la glucosa y la síntesis de

adenosín trifosfato (ATP) en la mitocondria constituyen los mecanismos biológicos implicados en la disfunción muscular de la EPOC(10;24-31).

### **Disfunción muscular periférica**

En la etiología de la disfunción muscular es importante distinguir entre los músculos respiratorios y de las extremidades. La gran mayoría de los estudios realizados en los pacientes se han basado en el análisis del diafragma y cuádriceps, concretamente el vasto lateral, por su fácil accesibilidad y por tratarse de unos de los mayores músculos locomotores. Los factores y mecanismos biológicos específicamente implicados en la disfunción de cada grupo muscular se detallan a continuación.

Tal como se indica en la Figura 1A, el humo del cigarrillo, las alteraciones genéticas y epigenéticas, los trastornos metabólicos incluidas las deficiencias de vitamina D y testosterona, fármacos (corticoides), la presencia de comorbilidades, las exacerbaciones, la inflamación sistémica, la malnutrición, la inactividad física y el envejecimiento constituyen los factores implicados en la disfunción muscular periférica de los pacientes EPOC (2;3). Sin embargo, los factores más fuertemente involucrados en la disfunción muscular periférica son la inmovilización, las alteraciones nutricionales, las exacerbaciones repetidas, y los corticoides (32-35).

Por lo que respecta a los eventos biológicos implicados en la disfunción muscular periférica destacan una serie de alteraciones estructurales como la tendencia a un fenotipo muscular menos resistente a la fatiga, con las fibras de contracción rápida de menor tamaño, la pérdida de masa muscular y del número de capilares, el daño sarcomérico y sarcolémico, y las alteraciones mitocondriales de índole diversa (27;36;37) (Figura 1B).

En cuanto a los mecanismos moleculares mayormente involucrados en el desarrollo de disfunción muscular periférica en la EPOC se ha demostrado el papel preponderante del estrés oxidativo (27;37;38), definido como la producción excesiva de oxidantes respecto de los sistemas antioxidantes, la hipoxia crónica y sus interacciones con otros mecanismos, la hipercapnia que mediante la acidosis activa la degradación muscular, y el humo del cigarrillo que induce alteraciones estructurales (reducción proporciones de fibras resistentes a la fatiga) y de la actividad mitocondrial, así como el aumento de los niveles de estrés oxidativo muscular (39;40) (Figura 1B). Finalmente también se ha demostrado en otros estudios realizados en pacientes con EPOC que mecanismos como la proteólisis, la apoptosis, la autofagia, y la epigenética están involucrados en la etiología de la disfunción muscular periférica de dichos enfermos (22;27;37;38;41-43).

### **Disfunción muscular respiratoria**

En general los músculos respiratorios están menos gravemente afectados que los de las extremidades, puesto que existe un cierto efecto entrenamiento al tener que soportar las cargas inspiratorias durante toda la vida de los pacientes. Los artículos publicados en este tema se han basado en la demostración de los diversos eventos a partir de muestras obtenidas del diafragma costal mediante toracotomía realizada por indicación quirúrgica (fundamentalmente por neoplasias y cirugía de reducción de volumen).

Los factores mayormente implicados en la disfunción muscular respiratoria de la EPOC se ilustran en la Figura 2A. La hiperinsuflación pulmonar tanto estática como dinámica modifica la geometría del tórax, acortando la longitud del

diafragma, hecho que conlleva a una alteración de su longitud óptima para generar la presión negativa requerida durante la inspiración. Además los músculos respiratorios deben de hacer frente a un mayor trabajo respiratorio fruto del aumento en las cargas inspiratorias, elásticas, y resistivas impuestas por la limitación al flujo aéreo. Estos factores mecánicos, inherentes a la enfermedad obstructiva respiratoria, son los que contribuyen mayormente a la disfunción muscular respiratoria en la EPOC (3). Por otro lado, también se ha demostrado la existencia de una serie de factores que inducen una adaptación positiva, la cual confiere cierta resistencia a los músculos respiratorios (*training-like effect*) de estos pacientes, sobre todo cuando se comparan con sujetos sanos expuestos a idénticos volúmenes pulmonares elevados (3;44) (Figura 2A). Añadir que los factores implicados en la etiología de la disfunción muscular periférica enumerados anteriormente también participan en mayor o menor medida en la disfunción muscular respiratoria, tal como se indica en la Figura 2A.

A pesar de que se ha demostrado la contribución de diversos mecanismos biológicos a la disfunción de los músculos respiratorios de los pacientes con EPOC, también se ha podido confirmar la existencia de fenómenos adaptativos en su diafragma, contrarrestando así los potenciales efectos deletéreos: acortamiento de la longitud de las sarcómeras, aumento del contenido en mioglobina y mayores proporciones de fibras resistentes a la fatiga y del número de contactos capilares, incremento de la densidad mitocondrial, y mejorías en el potencial aeróbico del músculo (3;45-49) (Figura 2B). El fenotipo muscular final del diafragma en la EPOC resultará del balance entre los factores y mecanismos adaptativos y de los involucrados en la disfunción

muscular, a la vez que entre situación estable y exacerbación (Figura 2B). Sin embargo, en la EPOC avanzada, idénticos mecanismos biológicos (daño oxidativo, proteólisis, anabolismo reducido, apoptosis y epigenética (8;10;26;41;50) a los descritos en la disfunción muscular periférica afectarían al diafragma predominando sobre los mecanismos adaptativos (Figura 2B). En conclusión, en la EPOC estable existe un delicado equilibrio entre los mecanismos adaptativos y los negativos en los músculos respiratorios de los pacientes. En cambio la predominancia de factores como las exacerbaciones, las alteraciones nutricionales y el envejecimiento alteraría el balance hacia un fenotipo desadaptado, contribuyendo al fracaso ventilatorio y eventual muerte de los pacientes (3;10;23;33;50).

*Los estudios observacionales demuestran de manera consistente los factores y mecanismos biológicos implicados en el desarrollo de disfunción muscular en los pacientes EPOC. Evidencia GRADE 1A.*

## **EVALUACIÓN DE LOS MÚSCULOS RESPIRATORIOS: MANIOBRAS VOLUNTARIAS E INVOLUNTARIAS (Tabla 1)**

La valoración de la función muscular se utiliza habitualmente tanto para el diagnóstico como en la evolución de las enfermedades respiratorias u otras patologías con afectación muscular respiratoria. En los departamentos de función pulmonar existen diferentes pruebas que cuantifican tanto la fuerza como la resistencia de los músculos respiratorios (51).

### **Evaluación de la fuerza de los músculos respiratorios**

Las pruebas de valoración de la fuerza de los músculos respiratorios las podemos dividir en voluntarias e involuntarias. Las pruebas involuntarias de



evaluación de la fuerza de los músculos respiratorios son más complejas técnicamente de realizar pero sin embargo se evita el componente de colaboración del paciente.

### **Pruebas voluntarias de medición de la fuerza de los músculos respiratorios**

La valoración inicial de la fuerza de los músculos respiratorios es la espirometría forzada (51). Aunque inespecífica, en ella se puede detectar un descenso en la capacidad vital forzada (FVC) y por tanto un trastorno ventilatorio no obstructivo (52). Un descenso en la FVC mayor del 25% en la espirometría realizada en decúbito supino con relación a los valores obtenidos en sedestación, o una FVC inferior al 75% de referencia en decúbito supino con valores en sedestación normales indican una debilidad diafragmática (53).

Sin embargo, las presiones máximas generadas en boca, tanto inspiratoria (PIM) como espiratoria (PEM), son más específicas de la fuerza de los músculos respiratorios (51). La PIM refleja la fuerza realizada por todos los músculos inspiratorios; mientras que la PEM expresa fundamentalmente la fuerza de los músculos espiratorios de la prensa abdominal (51). La medición debe ser realizada por un técnico con experiencia, estando el paciente sentando, con pinza nasal, y normalmente se utiliza una sonda de presión conectada a una pieza bucal ocluíble, aunque actualmente también existen otros dispositivos electrónicos portátiles (51) . En ambos equipos debe existir un pequeño orificio de 1-2 mm de diámetro interno y 20-30 mm de longitud, para prevenir el cierre glótico durante la maniobra de PIM y minimizar la participación de los músculos buccinadores durante la ejecución de la PEM (54). Desde volumen residual (RV) se debe realizar una maniobra inspiratoria

máxima, mantenida durante al menos 1 segundo y con la válvula ocluida para la medición de la PIM (51) . La medida de la PEM se realiza cuando el paciente desde TLC, realiza una maniobra espiratoria forzada mantenida durante mínimo 1 segundo con la válvula ocluida (51). Entre cada una de las maniobras se realizara una pausa de 1 minuto, además el técnico estimulará al sujeto tanto verbal como visualmente para realizar el máximo esfuerzo (51). Existe una gran variación intra-individuo en las determinaciones de las presiones máximas de los músculos respiratorios generadas en boca (51;55-57). Por tanto, se recomienda conseguir tres maniobras aceptables y con una variación inferior al 20%, aunque tampoco así se puede garantizar que se haya realizado el máximo esfuerzo (51;58). Por este motivo se aconseja registrar la colaboración y cooperación del paciente con algunas escalas específicas como por ejemplo la propuesta por John Moxham (Test of respiratory muscle strength. *UptoDate* 2013, tabla 2). Los valores en población mediterránea se pueden expresar con respecto a los publicados por Morales y colaboradores (59) para población sana mediterránea, sin embargo para otras poblaciones son necesarios valores de referencia específicos. En todos los casos, si las presiones máximas inspiratorias de los músculos respiratorios medidos en boca son superiores a 80 cm H<sub>2</sub>O podemos excluir la presencia de disfunción grave (51).

Debido fundamentalmente a los problemas relacionados con la dificultad de coordinación y colaboración para realizar las maniobras de PIM, se han desarrollado alternativas para medir la fuerza de los músculos inspiratorios. Entre otros, la determinación de la presión nasal durante una inhalación máxima (SNIP) (12;51;60;61). La inhalación forzada es una maniobra natural,

dinámica, que realizamos normalmente sin oclusión de las fosas nasales y que produce la contracción del diafragma y de otros músculos inspiratorios (61-63). La determinación de la SNIP se realiza con el sujeto en sedestación y la oclusión de un orificio nasal por un catéter conectado a un transductor de presión, realizando una maniobra de inhalación forzada desde capacidad funcional residual (FRC) (12;51). Se realizan un mínimo de 10 maniobras, con periodos de reposo entre ellas, y seleccionando el mejor valor (64). Valores de SNIP superiores a -70 cm H<sub>2</sub>O (hombres) o -60 cm H<sub>2</sub>O (mujeres) excluyen disfunción muscular inspiratoria (51).

La determinación de la presión esofágica durante la inhalación forzada (*sniff*Pesmax) es la mejor medida de la presión generada por la activación de los músculos inspiratorios y refleja la presión pleural. Sin embargo, se precisa de la colocación de una sonda de presión a nivel del tercio medio del esófago (51;65). Para la determinación de la *sniff*Pesmax se realizan varias maniobras de inhalación forzada desde FRC con boca cerrada y orificios nasales no ocluidos, y con periodos de reposo entre ellas de 1-2 minutos (51). Valores de *sniff*Pesmax superiores a -80 cm H<sub>2</sub>O (hombres) o -70 cm H<sub>2</sub>O (mujeres) excluyen disfunción muscular inspiratoria (51).

También es posible determinar la fuerza diafragmática o presión transdiafrágica (Pdi), midiendo la diferencia entre la presión gástrica y esofágica. Se determina mediante la colocación de dos sondas de presión, una en el tercio medio del esófago y otra en cavidad gástrica (51). La Pdi se puede determinar mediante maniobras con vía aérea ocluida (estáticas) y abierta (dinámicas). Dentro de las maniobras estáticas, podemos medir la fuerza diafragmática inspiratoria, para ello el sujeto realizara una inspiración forzada

desde RV (similar a la PIM) y que se denomina maniobra de *Mueller*, y la espiratoria, mediante una espiración forzada desde TLC es decir como la PEM y que se denomina maniobra de *Valsalva* (51). Sin embargo, para estas mediciones se precisa la coordinación entre el paciente y técnico. Esto se evita con las maniobras dinámicas, siendo estas las indicadas para medir la fuerza diafragmática (51;65). Dentro de estas últimas, la *sniffPdi* se determina realizando una inhalación máxima desde FRC (51;65). Valores de *sniffPdi* superiores a 100 cm H<sub>2</sub>O (hombres) o 70 cm H<sub>2</sub>O (mujeres) son considerados normales, mientras que descenso superior a un 25% con respecto a estos valores se considera disfunción diafrágica (60).

*Los diversos estudios demuestran de manera consistente como las pruebas de maniobras voluntarias de evaluación de la función muscular respiratoria son útiles y ofrecen mediciones confiables y comparables en el tiempo y entre individuos. Evidencia GRADE 1A.*

### **Pruebas involuntarias de medición de la fuerza de los músculos respiratorios (Tabla 1)**

Las pruebas anteriormente descritas son voluntarias, y por tanto los valores bajos no necesariamente indican una disfunción muscular respiratoria. Con el fin de evitar falsos positivos se han desarrollado técnicas de estimulación externa del nervio frénico mediante campos eléctricos o magnéticos (*Pdi twitch*), con valores de normalidad entre un 20-30% inferiores a los de la *sniffPdi* (51;60). La estimulación del nervio frénico se realiza colocando el estimulador eléctrico en el borde posterior del músculo esternocleidomastoideo a la altura del cartílago cricoides mientras que las palas magnéticas se colocan sobre el la región cervical, uni o bilateralmente (51).

*Los diversos estudios demuestran de manera consistente como las pruebas de maniobras involuntarias de evaluación de la función muscular respiratoria son útiles y ofrecen mediciones confiables y comparables en el tiempo y entre individuos. Evidencia GRADE 1A.*

### **Evaluación de la resistencia de los músculos respiratorios (Tabla 1)**

Es posible también determinar la resistencia de los músculos respiratorios mediante diferentes pruebas, pero no son sencillas de realizar y además presentan limitaciones (51). A continuación, se describen brevemente con orden de menor a mayor complejidad técnica.

El producto presión-tiempo (PTP) se calcula realizando la integración de la presión respiratoria medida en boca, esófago o incluso con Pdi, con respecto al tiempo (cm H<sub>2</sub>O-min) (51). La PTP es un parámetro que describe la actividad de los músculos respiratorios para generar presión independientemente del patrón respiratorio, de la carga o del consumo de oxígeno de los músculos (66;67). No ha sido estudiado ampliamente (51), por lo que se recomienda utilizar este parámetro con precaución.

Otra prueba es determinar la ventilación máxima sostenible (MSV), expresada con respecto a la ventilación voluntaria máxima (VVM); considerándose normal entre un 60-80% de la VVM (51). La MSV refleja la resistencia de los músculos respiratorios, así como la función de otros elementos de la caja torácica (68). Normalmente, se comienza respirando con el 20% VVM e incrementándose cada 3 minutos un 10% VVM hasta no poder mantener el objetivo de ventilación (51;69;70). La MSV se calcula con la ventilación realizada en las 10 últimas respiraciones del último minuto en que el paciente alcanzó el objetivo de ventilación (69;70).

Es posible evaluar la resistencia de los músculos inspiratorios determinando el tiempo que se mantiene la ventilación con una carga externa pudiendo utilizar resistencias de flujo, elásticas, umbrales o a isoflujo (51). Se han descrito diferentes pruebas con cargas externas (71-75) sin embargo la más utilizada es la realizada con una válvula umbral siguiendo el protocolo descrito por *Martyn* (72). El paciente inspira con una válvula umbral aplicando una carga externa con la que genera una presión entre el 30-40% de la PIM, posteriormente se va incrementando la carga para producir aumentos entre el 5-10% de la PIM cada dos minutos (72). La presión pico máxima es la que genera durante los últimos 2 minutos que el paciente tolera la carga, aunque se desconocen los valores de normalidad (72). También es posible utilizar un porcentaje estable de dicha presión máxima o de la PIM y medir el tiempo de aguante (Tlim).

*Los diversos estudios demuestran de manera consistente como las pruebas de resistencia y parámetros empleados para la evaluación de la función muscular respiratoria son útiles y ofrecen mediciones confiables y comparables en el tiempo y entre individuos. Evidencia GRADE 1A.*

## **EVALUACIÓN DE LOS MÚSCULOS PERIFÉRICOS: MANIOBRAS VOLUNTARIAS E INVOLUNTARIAS**

### **Puntos clave**

- La valoración de los músculos periféricos permite valorar un aspecto relevante de la enfermedad (5;76-80) y dirigir correctamente las estrategias de tratamiento.

-El espectro de medidas y pruebas es muy amplio y se encuentra en desarrollo, de manera que su empleo variará con el propósito de nuestra valoración y la disponibilidad de técnicas y equipamientos más o menos estandarizados.

-Las alternativas en la determinación del estado de los músculos periféricos de un paciente son: 1) el enfoque general de toda la masa muscular o de solo un músculo o grupo muscular. 2) Medida de la masa o la función muscular. 3) La función muscular puede ser evaluada a través de la medición de la fuerza o la resistencia. 4) las medidas funcionales pueden ser voluntarias, generalmente más sencillas, o involuntarias, complejas pero sin sesgo de colaboración o aprendizaje.

-Los múltiples enfoques se reproducen esquemáticamente en la Figura 3.

-La valoración de un paciente comienza con la anamnesis y exploración física, incluye los datos antropométricos, con atención a las variaciones del BMI y sobre todo a las pérdidas no deliberadas de peso. Más específica es la determinación de la masa magra, o el índice de masa magra, en analogía con el BMI, que puede realizarse mediante básculas y sistemas de bioimpedancia o por absorciometría dual de rayos X (DEXA).

-La evaluación de la función muscular de los músculos periféricos de extremidades, y sobre todo de las inferiores, pueden ser de cuantificación de la masa muscular o su función, por técnicas más o menos estandarizadas. El músculo más representativo y estudiado es el cuádriceps femoral, por ser el principal actor en la extensión de la pierna, ser fácil de medir, y por la relación directa con la actividad de los miembros inferiores.

-Las medidas voluntarias, o volitivas, que valoran la fuerza o la resistencia muscular con maniobras de contracción voluntaria han mostrado no ser

siempre representativas, incluso en sujetos sanos. Por esta dificultad se han desarrollado técnicas de estimulación neuromuscular que permiten una valoración completamente independiente de la voluntad o que superpuestas a esfuerzos voluntarios nos informan de si la activación muscular realizada es máxima y por tanto valorable.

## **TÉCNICAS DE EVALUACIÓN DE LOS MÚSCULOS PERIFÉRICOS**

### **Valoración de la masa muscular (MM)**

Las primeras aproximaciones se basan en sistemas de cálculo de compartimentos corporales, como el de Matiegka (81), que considera el peso corporal (W) como la suma de cuatro componentes,  $O + D + M + R$ ; donde O es peso esquelético (ósea), D es la piel más tejido adiposo subcutáneo, M es el peso del músculo esquelético y R en el peso restante. El sistema de “antropometría de pliegue cutáneo” requiere de diversas medidas como la altura, longitud y ancho de la extremidad, pliegues y área de superficie corporal calculada, pero generalmente resulta en una sobreestimación de la FFM en comparación con otros métodos (82). El desarrollo tecnológico ha traído diversos sistemas, algunos invasivos y complejos, como el espacio de dilución de deuterio (82), (prueba de oro) *gold standard* sólo accesible a centros de investigación, pero que han permitido validar una serie de medidas de uso más común.

### **Análisis de bioimpedancia (BIA) o impedancia bioeléctrica**

Se basa en la mayor conductividad de una corriente eléctrica a través de la masa magra, asimilable a la MM, en comparación con la masa grasa (83). La medición no es invasiva, es de bajo costo, sólo toma unos pocos minutos, y no



requiere una colaboración activa. Sin embargo, es importante utilizar ecuaciones que se hayan validado en la EPOC para estimar la composición corporal, frente a otras incluidas en los sistemas (84).

### **Absorciometría de rayos X (DEXA)**

La DEXA es una técnica de imagen que permite estimar la masa muscular en regiones esqueléticas y en todo el cuerpo, y que nos proporciona además la cuantificación del tejido magro, grasa, y densidad mineral ósea (85). Además permite diferenciar entre la masa muscular troncal y la periférica. La técnica DEXA es de uso universalmente extendido, con una mínima radiación (0,02 mSv) y un costo relativamente bajo. En los pacientes con EPOC, DEXA se ha comparado con dilución de deuterio (86) para la evaluación de la FFM con resultados equivalentes.

*Los diversos estudios demuestran de manera consistente como las diversas pruebas de cuantificación de la masa muscular en los pacientes EPOC son útiles y ofrecen mediciones confiables y comparables en el tiempo y entre individuos. Evidencia GRADE 1A.*

### **TÉCNICAS DE ESTUDIO LOCAL DE LA MM**

Además de las técnicas descritas que evalúan la FFM de todo el cuerpo, están disponibles varias medidas de la masa muscular de los miembros, que aportan información adicional, ya que se ha visto que en la EPOC, la correlación entre la masa muscular de todo el cuerpo y la regional de extremidades inferiores es pobre (87). Aunque la medición de la circunferencia del muslo es simple y barata, no es una buena medida de la masa muscular local (88). Como alternativas se han empleado la tomografía computarizada (TC) (88), la resonancia magnética (RM) (89), y la ecografía (90), sobre todo para medir

tamaño del cuádriceps en la EPOC. La cantidad de MM local medida por estas técnicas se ha relacionado con resultados relevantes en la EPOC, como la fuerza muscular (87) y la mortalidad (88).

La biopsia muscular es una técnica morfológica que informa de las propiedades estructurales y bioquímicas de los músculos de los miembros(91), pero tiene un lugar limitado a la investigación por su carácter invasor, incluso cuando se emplean agujas finas para microbiopsia (87).

*Los numerosos estudios demuestran de manera consistente como la obtención de un fragmento de músculo (biopsia) de los pacientes EPOC es de gran utilidad y ofrece mediciones confiables y comparables en el tiempo y entre individuos. Evidencia GRADE 1A.*

## **VALORACIÓN DE LA FUNCIÓN MUSCULAR**

Si bien actividad física y capacidad de ejercicio no son lo mismo, ambas están íntimamente relacionadas con la función muscular y su valoración nos da importante información de cara a valorar el trofismo y funcionalismo de los músculos periféricos, así como posibles causas de su disfunción (92).

### **Medidas de actividad física**

La actividad de una persona puede ser medida tanto por cuestionarios como, más fiablemente, mediante acelerómetros que registran las actividades realizadas por un sujeto en un periodo prolongado (93) . Presentan una buena correlación con otros marcadores funcionales e índices multidimensionales para morbilidad, pero se mantiene como un factor pronóstico independiente (94).

## **Pruebas de esfuerzo**

Tanto la prueba de marcha como la ergometría son comentadas más ampliamente en otro capítulo de la normativa. Para su valoración, se valora el estado cardiorrespiratorio, pero también el funcionamiento de los músculos periféricos del paciente. Así, es de resaltar que la fatiga muscular periférica durante el ejercicio justifica la reducción de la eficacia de los broncodilatadores para producir mejoras en la tolerancia al ejercicio (88). Esta fatiga puede demostrarse objetivamente en 48 a 58% de los pacientes con EPOC (89), mediante criterios de electromiografía o por disminución del *twitch* potenciado tras el esfuerzo (90). Para pruebas más sencillas, como la prueba de marcha de 6 min se ha encontrado también una correlación significativa con la fuerza muscular del cuádriceps (88).

*Los diversos estudios demuestran de manera consistente como la determinación de la actividad física y la capacidad de ejercicio de los pacientes EPOC es de gran utilidad y ofrece mediciones confiables y comparables en el tiempo y entre individuos. Evidencia GRADE 1A.*

## **Electromiografía (EMG)**

La EMG consiste en registrar la actividad eléctrica procedente de los músculos en reposo y durante la contracción. Se puede considerar como una técnica bien estandarizada, aunque su utilidad dentro del campo de la neumología es limitada. Habitualmente se emplean electrodos de superficie en la zona anatómica a estudio (cuádriceps), pero también se pueden emplear electrodos de aguja para el estudio de actividad de fibras musculares próximas al lugar de inserción (95;96). Desde un punto de vista teórico, es posible la evaluación de patrones de fatiga muscular (análisis espectral, con desviación del espectro

hacia las frecuencias bajas (97). Esta técnica nos permite obtener información diferente a la valoración de la fuerza muscular ya que en ésta influyen diferentes factores a la activación neuromotora (98).

*Los diversos estudios demuestran de manera consistente como la electromiografía para valorar la función muscular de los pacientes EPOC es de gran utilidad y ofrece mediciones confiables y comparables en el tiempo y entre individuos. Evidencia GRADE 1A.*

## **PRUEBAS DE FUNCIÓN DE MÚSCULOS PERIFÉRICOS**

La utilización de dinamómetros ha permitido estandarizar una serie de medidas. Sin embargo, para valorar las medidas tenemos que tener en cuenta las diferencias entre sexos, según la edad y, en el caso de las extremidades inferiores, también según el peso del sujeto (4) y las dificultades de colaboración de muchos pacientes.

### **Dinamometría de prensión de mano (*handgrip*)**

Es una medida sencilla, llevada a cabo con diferentes dinamómetros y que es ampliamente utilizada, con valor pronóstico en la EPOC (99). Los pacientes debe estar sentados con los hombros en aducción, los codos flexionados a 90 ° y los antebrazos en una posición neutral. Un técnico entrenado proporcionará instrucciones para que el paciente apriete el dispositivo tanto como sea posible. Se recomienda utilizar la mejor de seis mediciones (tres veces para cada lado, con una variabilidad entre maniobras < 5%) (100). Existen valores de referencia para diversas poblaciones (101;102).

## **TÉCNICAS DE ESTUDIO LOCAL DE LA MM**

Además de las técnicas descritas que evalúan la FFM de todo el cuerpo, están disponibles varias medidas de la masa muscular de los miembros, que aportan información adicional, ya que se ha visto que en la EPOC, la correlación entre la masa muscular de todo el cuerpo y la regional de extremidades inferiores es pobre (87). Aunque la medición de la circunferencia del muslo es simple y barata, no es una buena medida de la masa muscular local (88). Como alternativas se han empleado la tomografía computarizada (TC) (88), la resonancia magnética (RM) (89), y la ecografía (90), sobre todo para medir tamaño del cuádriceps en la EPOC. La cantidad de MM local medida por estas técnicas se ha relacionado con resultados relevantes en la EPOC, como la fuerza muscular (87) y la mortalidad (88).

La biopsia muscular es una técnica morfológica que informa de las propiedades estructurales y bioquímicas de los músculos de los miembros(91), pero tiene un lugar limitado a la investigación por su carácter invasor, incluso cuando se emplean agujas finas para microbiopsia (87).

*Los diversos estudios demuestran de manera consistente como las pruebas de evaluación de la función de contracción y masa muscular de los pacientes EPOC son de gran utilidad y ofrecen mediciones confiables y comparables en el tiempo y entre individuos. Evidencia GRADE 1A.*

Evidencia GRADE 1A.

### **Contracción isométrica máxima del cuádriceps femoral (QCMV)**

Se realiza clásicamente según Edwards (103), en postura sentada (ocasionalmente tumbada), con caderas y las rodillas siempre flexionadas a 90°, mediante la extensión del cuádriceps con la pierna fijada por el tobillo mediante una cincha conectada a un dinamómetro. Se valora la máxima

contracción de al menos tres intentos sostenidos durante 5 a 10 segundos, y con *feedback* visual para el paciente y el técnico para incentivar la prueba. Un *plateau* en la morfología de los esfuerzos, con variación inferior al 5% entre ellos y la no identificación de un pico de fuerza por estimulación neuromuscular sobreimpuesta, si disponible, son criterios de esfuerzo máximo (4;5). Existen valores de referencia (104).

## **TÉCNICAS DE ESTUDIO LOCAL DE LA MM**

Además de las técnicas descritas que evalúan la FFM de todo el cuerpo, están disponibles varias medidas de la masa muscular de los miembros, que aportan información adicional, ya que se ha visto que en la EPOC, la correlación entre la masa muscular de todo el cuerpo y la regional de extremidades inferiores es pobre (87). Aunque la medición de la circunferencia del muslo es simple y barata, no es una buena medida de la masa muscular local (88). Como alternativas se han empleado la tomografía computarizada (TC) (88), la resonancia magnética (RM) (89), y la ecografía (90), sobre todo para medir tamaño del cuádriceps en la EPOC. La cantidad de MM local medida por estas técnicas se ha relacionado con resultados relevantes en la EPOC, como la fuerza muscular (87) y la mortalidad (88).

La biopsia muscular es una técnica morfológica que informa de las propiedades estructurales y bioquímicas de los músculos de los miembros(91), pero tiene un lugar limitado a la investigación por su carácter invasor, incluso cuando se emplean agujas finas para microbiopsia (87).

*Los diversos estudios demuestran de manera consistente como las pruebas de evaluación de la función de contracción y masa muscular, incluida la biopsia*

*muscular para examinar eventos moleculares en los pacientes EPOC son de gran utilidad y ofrecen mediciones confiables y comparables en el tiempo y entre individuos. Evidencia GRADE 1A.*

### **Prueba de tiempo de resistencia al 10% de la Q-CMV**

Fue descrita por Coronell y cols (6). Es una prueba de resistencia. Se fundamenta en la demostración de una claudicación tras un ejercicio en ciclos de contracción con una carga equivalente al 10% de la MCV del cuádriceps, en ciclos de 2 segundos de contracción con 3 segundos de relajación. La claudicación puede venir por síntomas o por esfuerzos repetidos ineficaces para la carga. Los autores documentan la fatiga muscular como un fenómeno previo a la aparición de esta claudicación, demostrable por criterios electromiográficos. No obstante, esta prueba permanece como una aproximación sencilla para describir la resistencia muscular.

Existen dinamómetros dinámicos útiles en pacientes con EPOC (105), específicos para un tipo de ejercicio y que permiten valorar la fuerza no sólo en movimientos isométricos, sino en rangos de movimiento. Así, proporcionan una medida del par de fuerzas (*torque*) en Nm (Newton \* metro) y se adecuan más específicamente a la medición de la resistencia (106).

*Los diversos estudios demuestran de manera consistente como las pruebas de evaluación de la función muscular (resistencia) son de gran utilidad y ofrecen mediciones confiables y comparables en el tiempo y entre individuos. Evidencia GRADE 1A.*

### **MEDICIONES NO VOLUNTARIAS**

***Twitch* magnético supramáximo del cuádriceps femoral (QT<sub>w</sub>):**

La técnica se basa en la estimulación eléctrica o magnética del nervio femoral en una estimulo único, o *twitch*, con medición de la fuerza generada con la activación del cuádriceps (78;107). La estimulación magnética, más habitual por indolora, precisa de un electroimán de suficiente potencia y una bobina, normalmente en forma de “8”, que permita proyectar un campo magnético de intensidad supramáxima en la localización del nervio femoral, en el triángulo inguinal. La supramaximalidad del estímulo se demuestra por un “plateau” de respuesta entre los niveles superiores de estimulación (80%, 90%, 95% y 100% del estímulo máximo) (108). El QT<sub>w</sub> se mide con el sujeto relajado y reclinado en una camilla, con la rodilla flexionada y manteniendo el tobillo conectado por una cincha a un dinamómetro, similar a la realización de la MVC del cuádriceps. Se debe evitar el fenómeno de la potenciación post-activación, por lo que son esenciales un reposo de 20 minutos previo a la prueba y observar un tiempo de reposo entre estímulos *twitch* de al menos 30 segundos (108).

*Los diversos estudios demuestran consistentemente como las pruebas de maniobras no voluntarias para la evaluación de la función muscular en los pacientes EPOC son de gran utilidad y ofrecen mediciones confiables y comparables en el tiempo y entre individuos. Si bien su utilización no está extendida en la clínica habitual. Evidencia GRADE 1B.*

## **EVALUACIÓN DE LA CAPACIDAD DE ESFUERZO: PRUEBA DE MARCHA DE 6 MINUTOS**

La prueba de marcha de 6 minutos es un protocolo simple de ejercicio que consiste en la medición de la distancia caminada de forma rápida por el paciente en una superficie plana y dura durante un período de 6 minutos (109).



Entre las diferentes pruebas de campo (escaleras, Bruce, marcha de 12 minutos, marcha incremental, etc.) (109-111), la prueba de marcha de 6 minutos es la más popular, siendo en la actualidad el protocolo simple de ejercicio de referencia. Tiene un buen nivel de estandarización (109;112;113), con una reproducibilidad razonable (114) y ha probado ser muy útil para la evaluación del estado funcional de los pacientes, así como para medir los efectos de diferentes intervenciones en una gran variedad de enfermedades crónicas (115-120).

La prueba de marcha de 6 minutos corresponde a un ejercicio submáximo sostenible de alta intensidad (121) que nos permite evaluar de forma global e integrada las diferentes funciones (cardíaca, respiratoria, transporte periférico de oxígeno, bioenergética muscular e integración neuromuscular) que influyen la capacidad aeróbica del sujeto. Algunos estudios (121;122) sugieren que la intensidad de ejercicio durante la prueba corresponde a la carga máxima sostenible en el tiempo (carga crítica) (123) por el paciente. Ello explicaría su elevado valor predictivo de la mortalidad (115;118;119) y su valioso papel en el proceso de toma de decisiones clínicas (114;117;120).

Las indicaciones principales de la prueba son la evaluación del estado funcional de pacientes con diferentes patologías crónicas como la EPOC, el asma, la obesidad, las enfermedades intersticiales pulmonares, la hipertensión pulmonar y enfermedades cardiovasculares diversas (124-130) y la medición del efecto de intervenciones como: entrenamiento, trasplante pulmonar, cirugía de resección de parénquima pulmonar e intervenciones farmacológicas en la hipertensión pulmonar, EPOC e insuficiencia cardíaca) (116;117). Aunque se trata de un protocolo de ejercicio muy seguro, dado que el mismo paciente

determina la velocidad de la marcha, la prueba no debe efectuarse en pacientes con angina inestable, infarto miocárdico reciente (1 mes), taquicardia con frecuencia superior a 120 c/min o situación de pico hipertensivo. Las medidas de seguridad y el entrenamiento de los profesionales son las propias de cualquier prueba de ejercicio (109).

### **Variables**

Las variables que se miden de forma rutinaria durante la prueba son: *i)* distancia caminada expresada en metros; *ii)* frecuencia cardíaca y saturación de oxihemoglobina con pulsioximetría al inicio y al final de la prueba; y, *iii)* síntomas: disnea y molestias en extremidades inferiores, evaluados mediante la escala de Borg al inicio y final de la marcha. Es bien conocido que en las patologías que suelen generar desaturación de la oxihemoglobina durante el ejercicio (enfermedades pulmonares intersticiales, hipertensión pulmonar, etc.), ésta es más acentuada en la prueba de marcha que en el ejercicio con cicloergometría. Ello se debe a que durante la marcha se moviliza mayor masa muscular que en la cicloergometría.

La prueba debe efectuarse en un pasillo que permita una marcha sin giros de al menos 30 metros. Dicha distancia se marca generalmente con dos conos para facilitar el cálculo de la distancia total caminada. Durante la marcha, el profesional estimula verbalmente al paciente cada minuto. Quince segundos antes del final de la prueba le avisa de que deberá detenerse. Es importante que se registren el número y tiempo de las interrupciones de la prueba en el caso de que las hubiere.

La primera vez que el paciente efectúa la prueba de marcha es aconsejable repetir la misma una segunda vez, con un intervalo aproximado de 1 hora, y

escoger la que tiene una mayor distancia recorrida. Ello es debido a que la mayoría de pacientes presentan un efecto aprendizaje. En los sucesivos estudios solo es necesario efectuar una prueba de marcha.

Si el paciente requiere oxigenoterapia, la prueba se efectúa con el régimen de oxígeno que necesite, y éste se anota en la hoja de registro de la prueba. Las pruebas sucesivas se realizan, si es posible, con el mismo régimen de oxigenoterapia.

### **Interpretación de resultados**

Para la comparación de los resultados obtenidos antes y después de una determinada intervención es muy importante la identificación de la diferencia mínima con significación clínica expresada en metros. Durante los últimos años se ha generado debate sobre este tema (109). En la actualidad, se acepta como significativa una diferencia de entre 25-30 metros después de una intervención en pacientes con EPOC, enfermedad en la que se ha analizado este parámetro (124;127;128;131).

Aunque los resultados en términos de distancia recorrida suelen interpretarse en forma de valores absolutos (metros), también se utilizan valores de referencia. Los más empleados son los de Enright et al (132). Cabe señalar que dichos valores de referencia suelen ser algo bajos y no se ajustan a las características de la población española. Los resultados de un estudio multicéntrico reciente efectuado con población mediterránea se hallan en fase de elaboración.

En resumen, la prueba de marcha de 6 minutos es altamente recomendable en la clínica como prueba de ejercicio simple para la valoración del estado funcional y del efecto de determinadas intervenciones en pacientes con

enfermedades respiratorias y cardíacas crónicas. La simplicidad, seguridad, reproducibilidad y elevado valor predictivo de la prueba hace que sea el protocolo simple de referencia para el estudio de la capacidad aeróbica en la clínica.

*Los diversos estudios demuestran de manera consistente como la prueba de marcha de 6 minutos es de gran utilidad y ofrece mediciones muy confiables y comparables en el tiempo y entre individuos. Es de gran beneficio en la clínica habitual y en estudios. Evidencia GRADE 1A.*

## **EVALUACIÓN DE LA CAPACIDAD DE ESFUERZO: CICLOERGOMETRÍA**

Las pruebas de esfuerzo realizadas en un laboratorio permiten valorar la tolerancia al ejercicio, bien sea definida como capacidad aeróbica máxima o como resistencia a un ejercicio intenso. También, si se dispone del equipo necesario para medir el intercambio de gases, se puede examinar las respuestas fisiológicas integradas y con una precisión variable las individuales de cada sistema implicado en el transporte de oxígeno. Además permiten medir la percepción del sujeto de síntomas provocados por el aumento de la función de los sistemas implicados como disnea, intensidad del esfuerzo o fatiga de los músculos activos, o el efecto del ejercicio sobre el patrón ventilatorio, IC o lactoacidosis, gases en arteria o vena, etc. en uno o varios momentos de ejercicio.

### **Pruebas de esfuerzo incrementales**

Permiten la evaluación tanto de la respuesta sub-máxima como la respuesta máxima y con frecuencia son capaces de identificar los mecanismos que subyacen a la disminución de la capacidad de ejercicio (133-136) y así adecuar

las intervenciones sobre la intolerancia al esfuerzo al origen de la limitación (135-144) y descartar otros procesos médicos que pudieran suponer un riesgo como el entrenamiento físico, aumentando la seguridad (133;145).

El procedimiento está bien estandarizado (110;133). Se usa con más frecuencia el cicloergómetro porque es barato, compacto, la potencia que suministra es conocida con precisión y no requiere práctica en la inmensa mayoría de los pacientes (110;133;146). Además es más apropiado para la valoración de intervenciones en los músculos de las extremidades inferiores que la marcha, por estar limitado con mucha más frecuencia por fatiga muscular y los síntomas originados en las piernas (147-149).

La mayoría de los “*softwares*” actuales son capaces de generar una gran cantidad de variables, pero las que han sido usadas con más profusión en estudios clínicos son el consumo máximo de oxígeno ( $\dot{V}O_2\text{max}$ ) y la potencia máxima ( $WR_{\text{max}}$ ) limitados por síntomas. El  $\dot{V}O_2\text{max}$  es un indicador global del funcionamiento del sistema de transporte oxígeno y, aunque en muchos pacientes con enfermedad respiratorias está limitado por la ventilación, su aumento tras intervenciones dirigidas a los músculos se deben casi siempre la mejoría de su metabolismo energético con reducción de la producción de ácido láctico y en consecuencia de la demanda ventilatoria (37;150;151). Además se correlaciona (moderadamente) con variables clínica relevantes como la actividad diaria, la disnea las actividades de la vida diaria y la supervivencia (152-162). El  $\dot{V}O_2\text{max}$  es una variable notablemente reproducible con coeficientes de variación que oscilan entre el 3 y el 7% cuando se alcanzan los criterios de esfuerzo máximo (163-165), se han obtenido mediciones

consistentes en estudios clínicos multicéntricos cuando se establecen controles de calidad adecuados (166;167) y, al menos en pacientes cardíacos, su mejoría tras intervenciones se traducen en mejorías de la supervivencia (168). Hasta la fecha no se ha determinado la diferencia clínicamente relevante, pero en estudios poblacionales diferencias de 1MET (  $\sim 0.25 \text{ l} \cdot \text{min}^{-1}$  para una persona de 75 kg) se asociaba a un incremento de la supervivencia en 15 años del 12% (169). El  $\dot{V}O_2\text{max}$  es sensible a intervenciones tanto farmacológicas como no farmacológicas y en particular al entrenamiento muscular, pilar básico de la rehabilitación pulmonar, en EPOC, fibrosis quística, hipertensión pulmonar y asma (37;150;151;170-172), habiéndose comunicado cambios entre  $0.1\text{-}0.5 \text{ l} \cdot \text{min}^{-1}$  (10 to 40%) (37;150;151;170). Algunos estudios sin embargo no han encontrado modificaciones, en parte esta discrepancia se deben a diferencias en la intensidad (150;151) al grado de limitación ventilatoria (143;173), la función basal muscular (174) e incluso factores genéticos (175).

La potencia máxima ( $WR_{\text{max}}$ ) tiene la ventaja sobre el  $\dot{V}O_2\text{max}$  de que puede determinarse sin disponer de un carro metabólico, pero hay que tener en cuenta que, a diferencia del  $\dot{V}O_2\text{max}$ , la  $WR_{\text{max}}$  depende de la velocidad del protocolo incremental ( $\Delta WR/\Delta t$ ) previo y por tanto no se pueden hacer equivalencias con el  $\dot{V}O_2\text{max}$  y cuando se evalúe este parámetro el protocolo utilizado debe ser exactamente igual antes y después de la intervención o exposición (176). A pesar de esta limitación el  $WR_{\text{max}}$  es tan reproducible (133;136;167) y sensible intervenciones como el  $\dot{V}O_2 \text{ max}$ , con mejorías observadas entre el 7 y 35w y un efecto combinado de 8.4w (intervalo de confianza 95% CI:3.4-13.4) en EPOC moderada o grave tras rehabilitación

(177). La diferencia clínicamente significativa para pacientes con EPOC parece estar en torno a 10 w (178).

### **Pruebas constantes de intensidad alta**

:

Aunque se pueden hacer pruebas constantes de intensidad moderada para caracterizar la cinética de la respuesta del sistema de transporte de oxígeno, este tipo de prueba requieren un conocimiento del relativamente sofisticado ajuste de curvas monoexponenciales, por lo que su uso se reduce a estudios de investigación. Por el contrario las pruebas a una potencia constante de intensidad alta (PCIA) se han utilizado profusamente en estudios para evaluar intervenciones dirigidas a los músculos. La limitación más importante de las PCIAs es la selección de la potencia la que deben hacerse. Debido a que por encima de la potencia crítica (la máxima que se puede tolerar sin generar acidosis láctica progresiva) la relación entre la potencia aplicada y la duración de un ejercicio es hiperbólica (173;179), la duración de las PCIAs y el cambio tras una intervención vendrá determinada por su posición entre la mencionada potencia crítica y la  $WR_{max}$ . Es difícil estandarizar de una manera sencilla dicha posición (intensidad) para diferentes sujetos (134;173;179). A pesar de esta limitación, las PCIAs se han mostrada muy útiles en la práctica eligiendo empíricamente potencias del 75 al 85% de la  $WR_{max}$  (173;180-188) (Figura 4). La variable que define la tolerancia al ejercicio es el tiempo hasta que el paciente no puede seguir ( $T_{lim}$ ) en segundos. Se ha demostrado que  $t_{LIM}$  es reproducible (167;189) y consistente en ensayos multicéntricos (167). La diferencia clínicamente significativa para esta pruebas está en torno a los 100 s (intervalo de confianza 95%: 50-150s) (189). En estudios comparativos sea

visto que La PCIA es mucho más sensible a intervenciones que la prueba progresiva y que la prueba de marcha de 6 minutos (183;190) además permite mediciones isotiempo del volumen tele-espiratorio lactato, ventilación minuto, síntomas, y muchas otras variables que permiten identificar la base fisiológica de la mejoría (150;151;167;191).

*Los diversos estudios demuestran de manera consistente como la cicloergometría es de gran utilidad y ofrece mediciones muy confiables y comparables en el tiempo y entre individuos. Es beneficioso en la clínica habitual y en estudios. Evidencia GRADE 1A.*

## **ENTRENAMIENTO MUSCULAR EN LA DISFUNCIÓN MUSCULAR**

El entrenamiento muscular, que es el componente fundamental de los programas de Rehabilitación Respiratoria (RR), ha demostrado ampliamente su eficacia para mejorar la tolerancia al ejercicio, la fuerza muscular, la disnea, la fatiga y la calidad de vida, siendo por ello una intervención terapéutica primordial para el abordaje de la disfunción muscular de los pacientes con EPOC (2;192).

Sin embargo, existe una determinada proporción de pacientes EPOC (hasta un 30%) que no consigue mejorar con el entrenamiento físico o al menos en una magnitud similar a la mayoría. Los pocos estudios disponibles apuntan que los más respondedores son los EPOC con intolerancia al esfuerzo debida fundamentalmente a la debilidad muscular más que a la limitación ventilatoria. Así, aquellos EPOC que desarrollan mayor fatigabilidad contráctil del músculo cuádriceps durante el entrenamiento obtienen mayores beneficios (174).

En los pacientes con enfermedad respiratoria crónica, el entrenamiento muscular general debe estar dirigido tanto a mejorar la capacidad aeróbica



como la disfunción muscular característica de la enfermedad. La elección del tipo de entrenamiento estará condicionada por las necesidades del paciente y los objetivos planteados, pero también en gran medida por los recursos de que disponga el centro de rehabilitación (193;194).

*Los diversos estudios observacionales y ensayos clínicos demuestran de manera consistente como el entrenamiento muscular es el mejor tratamiento para la disfunción muscular de los pacientes EPOC. Es beneficioso en la clínica habitual y en estudios. Evidencia GRADE 1A.*

## **TIPOS DE ENTRENAMIENTOS**

### **Entrenamiento tipo aeróbico o de resistencia (del inglés “*endurance training*”)**

Es la modalidad de ejercicio más utilizada en RR, existiendo la máxima evidencia para su recomendación (1A) (2;192;195;196). El ejercicio aeróbico es un esfuerzo submáximo que implica a grandes masas musculares y se mantiene durante un tiempo prolongado. En pacientes con EPOC el entrenamiento físico tipo aeróbico no sólo consigue una mejor adaptación cardiovascular sino que también mejora la función de la musculatura periférica. Esto se traduce en un aumento de la resistencia muscular, con fenómenos adaptativos a nivel de la bioenergética del músculo cuádriceps como la reversión parcial de la disfunción oxidativa (197;198) o la reducción de la proporción de las fibras anaeróbicas de contracción rápida tipo IIb y el consiguiente aumento del porcentaje de fibras aeróbicas de contracción lenta tipos I y IIa (199). Incluso se produce un incremento del área de sección muscular (2) favorecido entre otros por la mayor expresión de los factores

regenerativos musculares IGF-1 y MyoD y la reducción de la expresión de miostatina (2). Estos beneficios se obtienen pese al estrés oxidativo y nitrosativo que el ejercicio puede provocar en el músculo periférico de estos pacientes (24). Por último, hay cada vez mayor evidencia del papel del entrenamiento en la regulación a la baja en el músculo periférico de la vía de degradación proteica de la ubiquitina, que ocurre incluso en pacientes con masa muscular preservada (2).

El entrenamiento con cicloergómetro, o en tapiz rodante son los ejemplos de ejercicio aeróbico más aplicados en la RR, sobre todo en los programas de régimen ambulatorio y ámbito hospitalario. En estudios recientes, las modalidades que incluyen caminar (ejemplo, caminata al aire libre, marcha nórdica) (193) han demostrado ser las más adecuadas si el objetivo es mejorar la capacidad de resistencia en la marcha. Otras modalidades de ejercicio aeróbico, como nadar, bailar, ciclismo, etc., tienen la ventaja de que se pueden practicar fácilmente fuera de una unidad hospitalaria de RR, en el entorno domiciliario del paciente, por lo que son muy recomendables para la fase de mantenimiento de los programas y para los protocolos exclusivamente domiciliarios (196).

En general, el ejercicio aeróbico se debe realizar como mínimo 3 veces a la semana y durante 20-30 minutos de manera continua o en intervalos, precedido de ejercicios de calentamiento y estiramiento de unos 10 minutos de duración. La intensidad del entrenamiento es muy importante en la prescripción del ejercicio terapéutico. Sabemos que niveles altos provocan una mayor respuesta fisiológica; por ello se recomienda una intensidad de trabajo que oscila entre el 60-80% de la capacidad de esfuerzo máxima, evaluada

previamente mediante una prueba de esfuerzo cardiopulmonar. Respecto a la duración total del entrenamiento aeróbico, hoy en día no existe un consenso generalizado y suele depender de los recursos disponibles (200;201). Se recomienda un mínimo de 8 semanas (196) para conseguir un beneficio sustancial, y 12 semanas como duración óptima (192) (Tabla 3). Programas de ejercicio más prolongados pueden conseguir mayores y más duraderos efectos sobre todo en los índices de calidad de vida (202).

*Los diversos estudios observacionales y ensayos clínicos demuestran de manera consistente como el entrenamiento muscular de resistencia es uno de los mejores tratamientos para la disfunción muscular y el restablecimiento de la capacidad de ejercicio de los pacientes EPOC. Es beneficioso en la clínica habitual y en estudios. Evidencia GRADE 1A.*

### **Entrenamiento Interválico**

Se trata de una modificación del entrenamiento aeróbico estándar, en el que periodos cortos (de uno o dos minutos de duración) de ejercicio de alta intensidad (80-120% de la capacidad máxima) se alternan de forma regular con periodos de igual duración de descanso o de trabajo a menor intensidad. De este modo, los pacientes alcanzan niveles altos de esfuerzo, pero con menor disnea y fatiga, y consiguiendo beneficios equivalentes a los del entrenamiento aeróbico clásico (199;203;204). Esta adaptación está especialmente recomendada para pacientes más sintomáticos e incapacitados y que no puedan mantener periodos de ejercicio continuo.

*Los diversos estudios observacionales y ensayos clínicos demuestran de manera consistente como el entrenamiento de tipo interválico es uno de los mejores tratamientos para la disfunción muscular y el restablecimiento de la*

*capacidad de ejercicio de los pacientes EPOC, sobre todo más graves y con peor capacidad de esfuerzo. Es beneficioso en la clínica habitual y en estudios. Evidencia GRADE 1A.*

### **Entrenamiento tipo fuerza**

En pacientes con EPOC, la debilidad del músculo cuádriceps se asocia a un incremento de la mortalidad (5) y utilización de recursos sanitarios. Siguiendo el “principio de especificidad”, un entrenamiento de fortalecimiento muscular es potencialmente más capaz de aumentar la fuerza y la masa de la musculatura ejercitada que el entrenamiento aeróbico clásico (205). Justamente, la evidencia disponible apoya el uso del entrenamiento de fuerza en combinación con el entrenamiento general aeróbico (1A), ya que consigue incrementos adicionales en la fuerza muscular periférica (192;196). Estos beneficios pueden incidir de manera sustancial en aspectos cotidianos del paciente con EPOC, al facilitar la realización de algunas tareas como subir escaleras, permanecer de pie o al realizar actividades sostenidas por los brazos (206). Además, el entrenamiento de fuerza provoca un menor estrés cardiopulmonar, con menor consumo de oxígeno, menor frecuencia cardíaca, y menores requerimientos ventilatorios y sensación de disnea, durante su ejecución, en comparación con el entrenamiento aeróbico (207). Por ello, este tipo de entrenamiento puede ser más adecuado para aquellos pacientes más disneicos o con determinadas comorbilidades cardiovasculares. A nivel molecular, el entrenamiento de fuerza induce la expresión de la IGF-1 muscular y otros factores reguladores miogénicos (2).

Para su aplicación en RR, habitualmente se recurre a los ejercicios de levantamiento de pesas para MMII y MMSS, realizados en aparatos

gimnásticos con cargas elevadas, al 70-85% del peso máximo que se puede movilizar en una única maniobra previa (o test de una repetición máxima, 1RM), y pocas repeticiones (196). Una prescripción recomendable sería realizar 2-4 series de 6-12 repeticiones de estos ejercicios, en 2-3 sesiones por semana, durante un total de 8-12 semanas (192;196).

El entrenamiento de fuerza requiere una mayor supervisión del paciente y un adiestramiento adecuado del personal, para asegurarnos una correcta cumplimentación y evitar así daños potenciales (192;195). En el ámbito domiciliario se recomienda el uso de mancuernas y bandas elásticas por su fácil aplicación.

*Los diversos estudios observacionales y ensayos clínicos demuestran de manera consistente como el entrenamiento muscular de fuerza es uno de los mejores tratamientos para la disfunción muscular y el restablecimiento de la capacidad de ejercicio de los pacientes EPOC, sobre todo más graves y con peor capacidad de esfuerzo. Es beneficioso en la clínica habitual y en estudios. Evidencia GRADE 1A.*

## **OTRAS MODALIDADES DE ENTRENAMIENTO**

En los últimos años se han desarrollado nuevas estrategias para mejorar el rendimiento del entrenamiento aeróbico, ya que muchos pacientes con afectación funcional severa no pueden alcanzar niveles altos de esfuerzo por la limitación ventilatoria y el estímulo muscular resulta insuficiente. El pedaleo con una sola pierna disminuye la masa muscular ejercitada de forma que los requerimientos ventilatorios del esfuerzo son también menores y el sujeto puede alcanzar una mayor sobrecarga. En pacientes con EPOC severa esta

técnica ha demostrado mayores ganancias en  $\text{VO}_2\text{max}$  que el pedaleo convencional (208). Otra modalidad de entrenamiento que favorece un menor esfuerzo ventilatorio es el pedaleo excéntrico, en el que la musculatura diana se contrae en alargamiento y que potencialmente puede inducir mayor daño muscular. En estudios iniciales en pacientes EPOC se han logrado cargas de trabajo más elevadas para un mismo nivel de esfuerzo ventilatorio, en comparación con el pedaleo concéntrico y sin provocar mayores efectos secundarios (209).

Formas alternativas muy prometedoras para el entrenamiento muscular periférico en los programas de RR son la estimulación eléctrica transcutánea (EET) (2;210;211) y la estimulación electromagnética (212) ésta última mejor tolerada pero menos estudiada. Son técnicas que inducen contracción muscular de forma pasiva, por lo que tienen gran utilidad en pacientes con dificultades para cumplimentar el entrenamiento global habitual, con inestabilidad clínica o en el ambiente domiciliario, aunque la recomendación actual para su uso es débil (2C). A nivel muscular, se han descrito efectos tales como hipertrofia de fibras tipo II, aumento de la proporción de las fibras tipo I en cuádriceps, mejora en la capacidad funcional y en fuerza muscular y todo ello con mínimo impacto sobre la ventilación, la frecuencia cardiaca y la disnea (2). En un estudio reciente, la EET de alta frecuencia demostró ser igualmente eficaz que el entrenamiento de fuerza para mejorar la fuerza del cuádriceps en pacientes con EPOC con mucha disnea y debilidad muscular (211).

### **Entrenamiento músculos respiratorios**

En los pacientes con EPOC, la hiperinsuflación sitúa a los músculos respiratorios en desventaja mecánica y provoca adaptaciones en el diafragma

por sobrecarga. Sin embargo, a pesar de ello, la fuerza y resistencia de la musculatura inspiratoria están comprometidas en estos pacientes, lo que puede contribuir a la hipercapnia, disnea, desaturación nocturna y capacidad de esfuerzo (192). En pacientes con EPOC, el entrenamiento muscular inspiratorio (EMI) ha demostrado mejorar la fuerza y la resistencia musculares, provocando beneficios en disnea, capacidad funcional y calidad de vida (213). A pesar de ello, y dada la evidencia disponible, el añadir EMI al entrenamiento general dentro de un programa de RR, sería recomendable sólo si se demuestra la existencia de debilidad de la musculatura inspiratoria ( $PIM < 60 \text{ cm H}_2\text{O}$ ) (192;196;213), por lo que este tipo de entrenamiento no se considera en la actualidad un componente fundamental del programa de RR (1B)(192;195). El EMI se realiza con dispositivos tipo resistivos (válvula con diversos orificios inspiratorios de diámetro decreciente, que obliga a aumentar proporcionalmente la presión inspiratoria para mantener el flujo inspiratorio) o de tipo umbral (se asegura una presión de trabajo independiente del flujo inspiratorio). La hiperpnea voluntaria isocápnica es una técnica dirigida al entrenamiento mixto inspiratorio-espирatorio consistente en mantener altos niveles de ventilación durante periodos de 10-15 min, que ha demostrado mejoras en fuerza y resistencia de la musculatura inspiratoria, pero que no se han traducido en beneficios en esfuerzo y calidad de vida (195). El entrenamiento específico de los músculos espiratorios mediante ejercicios de prensa abdominal es igualmente de dudosa eficacia. En general, el EMI debe realizarse 2 veces al día, a una intensidad de al menos el 30% de la PIM y en sesiones de unos 15 minutos de duración (196). Para un correcto entrenamiento, el paciente debe ser instruido por personal especializado y si es

posible, aprendiendo a controlar el patrón respiratorio (recomendación de expertos).

*Los diversos estudios demuestran consistentemente como el entrenamiento de los músculos respiratorios es beneficioso en pacientes EPOC con importante disfunción muscular respiratoria, en la clínica habitual y en estudios. Evidencia GRADE 1B.*

## **OTROS TRATAMIENTOS PARA LA DISFUNCIÓN MUSCULAR NO BASADOS EN EL ENTRENAMIENTO**

Aunque sin duda la rehabilitación es la aproximación terapéutica que ha mostrado mayor eficacia en el tratamiento de la disfunción muscular de las enfermedades respiratorias crónicas, sobre todo de la EPOC, medidas adicionales pueden mejorar los resultados, sobre todo en aquellos pacientes en los cuales una gran alteración funcional o la presencia de desnutrición grave va a interferir con la realización del ejercicio físico general que constituye el componente fundamental de la rehabilitación. Los suplementos nutricionales y la ventilación no invasiva pueden contribuir a la mejora de la función muscular y de la tolerancia al ejercicio en estos pacientes.

### **Suplementos nutricionales y tratamiento hormonal**

Las alteraciones nutricionales en pacientes con enfermedad respiratoria grave se cifran entre el 20 y el 40% y su génesis reviste un carácter multifactorial: desequilibrio entre el consumo y el gasto energético, la hipoxemia y el componente inflamatorio sistémico que frecuentemente acompaña a la enfermedad (214-216). Las consecuencias de la mal nutrición, sobre todo cuando existe ya una pérdida de masa magra van a ser una mayor alteración en la función física, con limitación de la capacidad de ejercicio, un incremento



de la morbilidad y, finalmente una mayor mortalidad (217). La utilización de suplementos nutricionales de alto valor energético en estos enfermos ha arrojado resultados contradictorios sobre la ganancia de peso pero sobre todo en cuanto a su impacto en la recuperación funcional. Las hormonas, fundamentalmente esteroides anabolizantes y la hormona de crecimiento, los antioxidantes y otras moléculas proteicas de alto valor energético han mostrado en general escasos resultados.

#### **a) Suplementos nutricionales**

El empleo de suplementos nutricionales en el manejo de los pacientes con EPOC es habitual, pero sin embargo existe poca evidencia que soporte esta práctica. Mientras que algunos autores han comunicado que se consiguen incrementos de peso y de masa magra, así como mejoras en la tolerancia al ejercicio, otros estudios no soportan estos datos. Más escasos todavía son los resultados encontrados en cuanto al impacto de los suplementos nutricionales en la fuerza muscular y en la tolerancia al ejercicio. En la más reciente revisión Cochrane (218), publicada en el año 2012, se realiza un metanálisis de 17 ensayos clínicos aleatorizados (219-233), que incluyen un total de 632 pacientes, con grados de obstrucción variable, diferente estado nutricional, en numerosas ocasiones con pocos enfermos y una heterogeneidad metodológica que, unido al tamaño de las diferencias de resultados encontradas entre los grupos de tratamiento y control, hace que la evidencia de las mismas sea considerada moderada o baja. Las variables analizadas fueron antropométricas (peso, masa magra, cociente masa magra/índice masa magra) y funcionales ( $FEV_1$ ,  $FEV_1\%$ , PIM, PEM, distancia recorrida en la prueba de marcha). Se ha encontrado una diferencia significativa a favor de los pacientes que recibían

suplementos nutricionales en ganancia de peso, masa magra, relación de masa magra/índice de masa magra y distancia caminada durante la prueba de 6 minutos, pero estos resultados eran sobre todo evidentes cuando el metanálisis se realizaba en el grupo de pacientes malnutridos. Con carácter general también se observa un incremento en la PEM, mientras que solo en los pacientes con malnutrición se produce un incremento en la PIM. Los autores concluyen que existe evidencia moderada de que los suplementos nutricionales pueden mejorar los parámetros antropométricos, la fuerza de los músculos respiratorios y la tolerancia al ejercicio en los pacientes con EPOC y alteraciones nutricionales.

Aparte la escasa calidad de la evidencia, no se discrimina entre estudios que asociaban ejercicio y los que no lo hacían, así como tampoco entre aquellos que, además de los suplementos, utilizaban anabolizantes. Por otra parte, solo el estudio de Sagawura (231), en el que los suplementos se combinaban con ejercicio de baja intensidad, incluía entre sus objetivos la valoración de los músculos periféricos, por lo que no se ha incluido en los resultados del metanálisis, aunque en el estudio los suplementos nutricionales adicionales al ejercicio se asocian a un incremento en la fuerza del cuádriceps. En este estudio, además del incremento en la distancia caminada durante la prueba de marcha, se observaba un aumento de la fuerza del cuádriceps. Todas estas limitaciones son reconocidas en las conclusiones de la revisión que destaca la necesidad de investigación adicional.

*Los estudios no demuestran de forma consistente que los beneficios superen a los riesgos en la administración de los tratamientos. Es de esperar que futuras investigaciones de mayor calidad aun puedan aportar mayor conocimiento y ayuden a implementar estos tratamientos en la clínica diaria en el manejo de*

*pacientes EPOC, de ponerse de manifiesto resultados más confiables que los actuales. Evidencia GRADE 2B.*

#### **b) Esteroides anabolizantes**

Hasta un 40% de los pacientes con EPOC muestran androgenopenia, que puede asociarse a pérdida de masa muscular (234). La administración de esteroides anabolizantes se ha asociado a ganancia de peso y de masa muscular, apoyando su utilización como adyuvantes en programas de rehabilitación. Sin embargo, los resultados no están suficientemente contrastados y, de hecho, las recomendaciones ERS-ATS de rehabilitación no los aconsejan (192). En un reciente metanálisis (235), partiendo de la consideración inicial de 171 publicaciones, se han recogido finalmente 8 estudios que cumplían los criterios exigidos: ensayos clínicos aleatorizados, en pacientes con diagnóstico confirmado de EPOC, que recibían tratamiento con anabolizantes durante al menos 3 semanas (228;236-241). Si bien el resultado del metanálisis pone de manifiesto un incremento de peso y de masa magra, no se obtienen resultados en ningún parámetro de función pulmonar, en tolerancia al ejercicio y en función muscular respiratoria (PIM), o periférica: fuerza de contracción de la mano. Por otra parte, el metanálisis incluye no solo tratamiento con derivados androgénicos sino también un estudio de hormona de crecimiento y un estudio con grelina. Además, aunque existen estudios con o sin entrenamiento al ejercicio concomitante, no se realiza un análisis por subgrupos. Todos estos factores limitan la interpretación del metaanálisis. Mas clarificador resulta la revisión que incluye exclusivamente 6 ensayos aleatorizados realizados con andrógenos (234). De estos 6 estudios, en dos de ellos los anabolizantes eran la única medida terapéutica (241;242), dos lo asociaban a entrenamiento al ejercicio (237;239) y los otros dos en un

programa multidimensional que incluía entrenamiento al ejercicio, suplementos nutricionales hiperproteicos e hipercalóricos y anabolizantes (228;243). En los dos ensayos en que los anabolizantes eran el único componente del tratamiento, su uso se asoció a ganancia de peso y en la masa muscular, pero no a mejoras en la tolerancia al ejercicio. Los resultados son discordantes en los dos estudios que combinan andrógenos con ejercicio, puesto que pese a que en ambos se observa un incremento, Ferreira (239) no encuentra cambios en PIM ni en distancia recorrida y, por el contrario Casaburi (237) si comunica aumento en fuerza muscular, capacidad y tolerancia al ejercicio. Por último, los mejores resultados se obtienen con la combinación de suplementos nutricionales, andrógenos y entrenamiento al ejercicio. El estudio de Schols (228) pone de manifiesto incremento el peso, masa magra y PIM, mientras que el de evaluación más completa, el de Pison (243) realizado en enfermos graves, desnutridos y con insuficiencia respiratoria, pone de manifiesto incremento en masa muscular, fuerza del cuádriceps, trabajo máximo y tiempo de resistencia al ejercicio.

*Los estudios no demuestran de forma consistente que los beneficios superen a los riesgos en la administración de los tratamientos. Es de esperar que futuras investigaciones de elevada calidad aun puedan aportar mayor conocimiento y ayuden a implementar estos tratamientos en la clínica diaria en el manejo de pacientes EPOC, de ponerse de manifiesto resultados más confiables que los actuales. Evidencia GRADE 2B.*

### **c) Hormona de crecimiento y grelina**

El uso de hormona de crecimiento humana recombinante (GH) también ha sido estudiada en pacientes con EPOC y desnutrición, en el seno de programas de rehabilitación. Los resultados, sin embargo, no son concluyentes. En un estudio abierto llevado a cabo en solo 7 pacientes (244), la

administración de GH produjo incremento de peso y de PIM, posteriormente esto no se ha confirmado en ensayos clínicos. Así en el estudio de Burnet (236), en el que la GH se asociaba a un programa de rehabilitación, se observó un incremento en la masa magra, pero no diferencias en tolerancia al ejercicio ni fuerza de músculos respiratorios o esqueléticos.

Más recientemente se ha probado la utilización de grelina, en pacientes con EPOC y desnutrición, incluidos en programas de rehabilitación. La grelina es una hormona polipeptídica que actúa fijándose sobre los receptores hipotalámicos estimulantes de GH, incrementando la liberación de GH (secretagoga). Además estimula también la liberación de factores orexígenos, asociándose a un aumento del apetito (245). Aunque los pacientes con EPOC y desnutrición suelen tener elevados los niveles de grelina (246), en un estudio abierto, no controlado, llevado a cabo en 7 pacientes caquéticos con EPOC, su administración exógena se asocia a un incremento en ingesta de alimentos, peso y masa magra, así como a una mejoría en la distancia recorrida en la prueba de marcha y la fuerza muscular respiratoria y periférica (247). Sin embargo en el único ensayo clínico publicado, en el que la administración de grelina se produce en el seno de un programa de rehabilitación (248) los resultados son débiles pues si bien en el grupo tratamiento se observa un incremento en metros recorridos durante el test de marcha y la PIM, las diferencias entre grupos no resultan significativas. Un subanálisis del mismo estudio, incluyendo datos de un solo centro, si encontraba diferencias en capacidad de ejercicio (249), pero en cualquier caso el número de pacientes es escaso y el tema sigue abierto a investigación.

*Los estudios no demuestran de forma consistente que los beneficios superen a los riesgos en la administración de los tratamientos. Es de esperar que futuras*

*investigaciones de elevada calidad aun puedan aportar mayor conocimiento y ayuden a implementar estos tratamientos en la clínica diaria en el manejo de pacientes EPOC, de ponerse de manifiesto resultados mucho más confiables que los actuales. Evidencia GRADE 2C.*

#### **d) Otros nutrientes**

Otros productos analizados en relación con su capacidad de mejorar la función muscular y física de los pacientes con EPOC, incluyen antioxidantes, vitaminas (246) y moléculas de alta capacidad energética, pero en general se trata de estudios aislados no controlados o ensayos de escaso número de pacientes que no se han reproducido. Aunque algunos estudios realizados con antioxidantes y con la administración de creatina como coadyuvante en rehabilitación arrojan resultados positivos en cuanto a incremento de fuerza muscular respiratoria y periférica, aparte de la escasez de datos, los resultados en tolerancia al ejercicio no son significativos (250;251).

*Los estudios no demuestran de forma consistente que los beneficios superen a los riesgos en la administración de los tratamientos. Es de esperar que futuras investigaciones de elevada calidad aun puedan aportar mayor conocimiento y ayuden a implementar estos tratamientos en la clínica diaria en el manejo de pacientes EPOC, de ponerse de manifiesto resultados mucho más confiables que los actuales. Evidencia GRADE 2C.*

#### **Tratamientos no farmacológicos: ventilación mecánica no invasiva y heliox**

Es un hecho conocido que la ventilación mecánica no invasiva (VMNI) consigue el descanso de los músculos respiratorios, lo que explica la mejoría experimentada en la función de estos, que se manifiesta por un incremento en la PIM, en la Pdimax y el índice tensión/tiempo. Aunque escasos, algunos estudios han asociado el uso de VNI a una mejor función de los músculos periféricos, puesta de manifiesto por un incremento en la fuerza y resistencia

del cuádriceps (252). La hipótesis que se ha utilizado para justificar este hecho es que la reducción en el trabajo respiratorio mejoraría el aporte de oxígeno a los músculos periféricos (253). Este mismo mecanismo se ha invocado para explicar el efecto de la respiración con heliox sobre la función de los músculos periféricos. En una reciente revisión Cochrane se ha realizado un metanálisis de 6 ensayos clínicos que evalúan los resultados de la VNI durante un programa de ejercicio físico. El número de pacientes es muy pequeño, 126 en total, la calidad de los estudios moderada y aunque el metanálisis muestra un incremento de la intensidad del ejercicio alcanzado al término del programa, las ligeras diferencias en capacidad de ejercicio y tolerancia al mismo son poco consistentes. En línea con las últimas recomendaciones de consenso establecidas por la ERS y ATS, no se recomienda con carácter general la utilización de VMNI durante el entrenamiento al ejercicio (192), que quedaría reservado para pacientes hipercápnicos en programas de VMNI nocturna, con buena respuesta a la misma.

*Los estudios demuestran consistentemente que los beneficios superen a los riesgos en la administración de los tratamientos. Si bien futuras investigaciones aun puedan aportar mayor conocimiento y ayudar a implementar estos tratamientos en la clínica diaria en el manejo de pacientes EPOC. Evidencia GRADE 2A.*

## **CONCLUSIONES**

En resumen, una buena función de músculos respiratorios y de las extremidades es esencial para mantener la vida y un nivel aceptable de calidad de vida. Dicha función se ve afectada en numerosas enfermedades respiratorias, pudiendo condicionar problemas tanto para la vida social del enfermo como para sostener un nivel adecuado de ventilación. La función

muscular puede y debe ser valorada en estos pacientes, con el fin de aplicar unas medidas terapéuticas adecuadas. A la luz de la evidencia actual, el entrenamiento con y sin suplementos nutricionales es sin lugar a dudas la mejor estrategia terapéutica para incrementar la masa y función muscular y calidad de vida de los pacientes EPOC.

**Agradecimientos:** Los autores agradecen el soporte recibido por Ester Puig-Vilanova y Anael Barberán-García por su inestimable contribución en la revisión bibliográfica e incorporación de las referencias. También agradecen la colaboración de Anna Salazar, María Cortés-Badia y Paula Bassagañas-Òdena en la confección del listado de abreviaturas y referencias en el documento.

#### Reference List

1. Guyatt G, Oxman AD, Akl EA, Kunz R, Vist G, Brozek J, et al. GRADE guidelines: 1. Introduction-GRADE evidence profiles and summary of findings tables. *J Clin Epidemiol.* 2011;64 (4) :383-94.
2. Maltais F, Decramer M, Casaburi R, Barreiro E, Burelle Y, Debigare R, et al. An official American Thoracic Society/European Respiratory Society statement: update on limb muscle dysfunction in chronic obstructive pulmonary disease. *Am J Respir Crit Care Med.* 2014;189 (9) :e15-e62.
3. Gea J, Agustí A, Roca J. Pathophysiology of muscle dysfunction in COPD. *J Appl Physiol* (1985) . 2013;114 (9) :1222-34.
4. Seymour JM, Spruit MA, Hopkinson NS, Natanek SA, Man WD, Jackson A, et al. The prevalence of quadriceps weakness in COPD and the relationship with disease severity. *Eur Respir J.* 2010;36 (1) :81-8.



5. Swallow EB, Reyes D, Hopkinson NS, Man WD, Porcher R, Cetti EJ, et al. Quadriceps strength predicts mortality in patients with moderate to severe chronic obstructive pulmonary disease. *Thorax*. 2007;62 (2) :115-20.
6. Coronell C, Orozco-Levi M, Mendez R, Ramirez-Sarmiento A, Galdiz JB, Gea J. Relevance of assessing quadriceps endurance in patients with COPD. *Eur Respir J*. 2004;24 (1) :129-36.
7. Shrikrishna D, Patel M, Tanner RJ, Seymour JM, Connolly BA, Puthuchearu ZA, et al. Quadriceps wasting and physical inactivity in patients with COPD. *Eur Respir J*. 2012;40 (5) :1115-22.
8. Barreiro E, de la Puente B, Minguella J, Corominas JM, Serrano S, Hussain SN, et al. Oxidative stress and respiratory muscle dysfunction in severe chronic obstructive pulmonary disease. *Am J Respir Crit Care Med*. 2005;171 (10) :1116-24.
9. Levine S, Kaiser L, Leferovich J, Tikunov B. Cellular adaptations in the diaphragm in chronic obstructive pulmonary disease. *N Engl J Med*. 1997;337 (25) :1799-806.
10. Marin-Corral J, Minguella J, Ramirez-Sarmiento AL, Hussain SN, Gea J, Barreiro E. Oxidised proteins and superoxide anion production in the diaphragm of severe COPD patients. *Eur Respir J*. 2009;33 (6) :1309-19.
11. Levine S, Kaiser L, Leferovich J, Tikunov B. Cellular adaptations in the diaphragm in chronic obstructive pulmonary disease. *N Engl J Med*. 1997;337 (25) :1799-806.
12. Polkey MI, Green M, Moxham J. Measurement of respiratory muscle strength. *Thorax*. 1995;50 (11) :1131-5.
13. Dekhuijzen PN, Decramer M. Steroid-induced myopathy and its significance to respiratory disease: a known disease rediscovered. *Eur Respir J*. 1992;5 (8) :997-1003.
14. Martin J, Powell E, Shore S, Emrich J, Engel LA. The role of respiratory muscles in the hyperinflation of bronchial asthma. *Am Rev Respir Dis*. 1980;121 (3) :441-7.

15. Tsushima K, Koyama S, Ueno M, Fujimoto K, Ichiyoshi T, Takei Y, et al. Rhabdomyolysis triggered by an asthmatic attack in a patient with McArdle disease. *Intern Med.* 2001;40 (2) :131-4.
16. Pinet C, Cassart M, Scillia P, Lamotte M, Knoop C, Casimir G, et al. Function and bulk of respiratory and limb muscles in patients with cystic fibrosis. *Am J Respir Crit Care Med.* 2003;168 (8) :989-94.
17. Spruit MA, Janssen DJ, Franssen FM, Wouters EF. Rehabilitation and palliative care in lung fibrosis. *Respirology.* 2009;14 (6) :781-7.
18. Martinez-Llorens J, Ramirez M, Colomina MJ, Bago J, Molina A, Caceres E, et al. Muscle dysfunction and exercise limitation in adolescent idiopathic scoliosis. *Eur Respir J.* 2010;36 (2) :393-400.
19. Gea J, Barreiro E, Orozco-Levi M. Skeletal muscle adaptations to disease states. In: Bottinelli R, Reggiani C, editors. *Skeletal muscle plasticity in health and disease: From genes to whole muscle.* Dordrecht: Springer; 2006. p. 315-60.
20. Anzueto A. Muscle dysfunction in the intensive care unit. *Clin Chest Med.* 1999;20 (2) :435-52.
21. Christensen JF, Jones LW, Andersen JL, Dugaard G, Rorth M, Hojman P. Muscle dysfunction in cancer patients. *Ann Oncol.* 2014;25 (5) :947-58.
22. Barreiro E, Sznajder JI. Epigenetic regulation of muscle phenotype and adaptation: a potential role in COPD muscle dysfunction. *J Appl Physiol.* 2013;114 (9) :1263-72.
23. Levine S, Bashir MH, Clanton TL, Powers SK, Singhal S. COPD elicits remodeling of the diaphragm and vastus lateralis muscles in humans. *J Appl Physiol.* 2013;114 (9) :1235-45.
24. Barreiro E, Rabinovich R, Marin-Corral J, Barbera JA, Gea J, Roca J. Chronic endurance exercise induces quadriceps nitrosative stress in patients with severe COPD. *Thorax.* 2009;64 (1) :13-9.
25. Barreiro E, Peinado VI, Galdiz JB, Ferrer E, Marin-Corral J, Sanchez F, et al. Cigarette smoke-induced oxidative stress: A role in chronic obstructive

- pulmonary disease skeletal muscle dysfunction. *Am J Respir Crit Care Med*. 2010;182 (4) :477-88.
26. Barreiro E, Ferrer D, Sanchez F, Minguella J, Marin-Corral J, Martinez-Llorens J, et al. Inflammatory cells and apoptosis in respiratory and limb muscles of patients with COPD. *J Appl Physiol*. 2011;111 (3) :808-17.
27. Femoselle C, Rabinovich R, Ausin P, Puig-Vilanova E, Coronell C, Sanchez F, et al. Does oxidative stress modulate limb muscle atrophy in severe COPD patients? *Eur Respir J*. 2012;40 (4) :851-62.
28. Puig-Vilanova E, Aguilo R, Rodriguez-Fuster A, Martinez-Llorens J, Gea J, Barreiro E. Epigenetic mechanisms in respiratory muscle dysfunction of patients with chronic obstructive pulmonary disease. *PLoS One*. 2014;9 (11) :e111514.
29. Puig-Vilanova E, Ausin P, Martinez-Llorens J, Gea J, Barreiro E. Do epigenetic events take place in the vastus lateralis of patients with mild chronic obstructive pulmonary disease? *PLoS One*. 2014;9 (7) :e102296.
30. Puig-Vilanova E, Rodriguez DA, Lloreta J, Ausin P, Pascual-Guardia S, Broquetas J, et al. Oxidative stress, redox signaling pathways, and autophagy in cachectic muscles of male patients with advanced COPD and lung cancer. *Free Radic Biol Med*. 2015;79:91-108.
31. Puig-Vilanova E, Martinez-Llorens J, Ausin P, Roca J, Gea J, Barreiro E. Quadriceps muscle weakness and atrophy are associated with a differential Epigenetic Profile in Advanced COPD. *Clin Sci (Lond)* . 2015.
32. Decramer M, de B, V, Dom R. Functional and histologic picture of steroid-induced myopathy in chronic obstructive pulmonary disease. *Am J Respir Crit Care Med*. 1996;153 (6 Pt 1) :1958-64.
33. Gayan-Ramirez G, Decramer M. Mechanisms of striated muscle dysfunction during acute exacerbations of COPD. *J Appl Physiol*. 2013;114 (9) :1291-9.
34. Pitta F, Troosters T, Probst VS, Spruit MA, Decramer M, Gosselink R. Physical activity and hospitalization for exacerbation of COPD. *Chest*. 2006;129 (3) :536-44.

35. Spruit MA, Gosselink R, Troosters T, Kasran A, Gayan-Ramirez G, Bogaerts P, et al. Muscle force during an acute exacerbation in hospitalised patients with COPD and its relationship with CXCL8 and IGF-I. *Thorax*. 2003;58 (9) :752-6.
36. Gosker HR, Zeegers MP, Wouters EF, Schols AM. Muscle fibre type shifting in the vastus lateralis of patients with COPD is associated with disease severity: a systematic review and meta-analysis. *Thorax*. 2007;62 (11) :944-9.
37. Maltais F, LeBlanc P, Simard C, Jobin J, Berube C, Bruneau J, et al. Skeletal muscle adaptation to endurance training in patients with chronic obstructive pulmonary disease. *Am J Respir Crit Care Med*. 1996;154 (2 Pt 1) :442-7.
38. Remels AH, Gosker HR, Langen RC, Schols AM. The mechanisms of cachexia underlying muscle dysfunction in COPD. *J Appl Physiol*. 2013;114 (9) :1253-62.
39. Barreiro E, Peinado VI, Galdiz JB, Ferrer E, Marin-Corral J, Sanchez F, et al. Cigarette smoke-induced oxidative stress: A role in chronic obstructive pulmonary disease skeletal muscle dysfunction. *Am J Respir Crit Care Med*. 2010;182 (4) :477-88.
40. Barreiro E, del Puerto-Nevado L, Puig-Vilanova E, Perez-Rial S, Sanchez F, Martinez-Galan L, et al. Cigarette smoke-induced oxidative stress in skeletal muscles of mice. *Respir Physiol Neurobiol*. 2012;182 (1) :9-17.
41. Barreiro E, Gea J. Epigenetics and muscle dysfunction in chronic obstructive pulmonary disease. *Transl Res*. 2014.
42. Hussain SN, Sandri M. Role of autophagy in COPD skeletal muscle dysfunction. *J Appl Physiol*. 2013;114 (9) :1273-81.
43. Puig-Vilanova E, Ausin P, Martinez-Llorens J, Gea J, Barreiro E. Do epigenetic events take place in the vastus lateralis of patients with mild chronic obstructive pulmonary disease? *PLoS One*. 2014;9 (7) :e102296.
44. Similowski T, Yan S, Gauthier AP, Macklem PT, Bellemare F. Contractile properties of the human diaphragm during chronic hyperinflation. *N Engl J Med*. 1991;325 (13) :917-23.

45. Doucet M, Debigare R, Joannis DR, Cote C, LeBlanc P, Gregoire J, et al. Adaptation of the diaphragm and the vastus lateralis in mild-to-moderate COPD. *Eur Respir J*. 2004;24 (6) :971-9.
46. Orozco-Levi M, Gea J, Lloreta JL, Felez M, Minguella J, Serrano S, et al. Subcellular adaptation of the human diaphragm in chronic obstructive pulmonary disease. *Eur Respir J*. 1999;13 (2) :371-8.
47. Orozco-Levi M, Lloreta J, Minguella J, Serrano S, Broquetas JM, Gea J. Injury of the human diaphragm associated with exertion and chronic obstructive pulmonary disease. *Am J Respir Crit Care Med*. 2001;164 (9) :1734-9.
48. Ribera F, N'Guessan B, Zoll J, Fortin D, Serrurier B, Mettauer B, et al. Mitochondrial electron transport chain function is enhanced in inspiratory muscles of patients with chronic obstructive pulmonary disease. *Am J Respir Crit Care Med*. 2003;167 (6) :873-9.
49. Wijnhoven JH, Janssen AJ, van Kuppevelt TH, Rodenburg RJ, Dekhuijzen PN. Metabolic capacity of the diaphragm in patients with COPD. *Respir Med*. 2006;100 (6) :1064-71.
50. Ribera F, N'Guessan B, Zoll J, Fortin D, Serrurier B, Mettauer B, et al. Mitochondrial electron transport chain function is enhanced in inspiratory muscles of patients with chronic obstructive pulmonary disease. *Am J Respir Crit Care Med*. 2003;167 (6) :873-9.
51. ATS/ERS Statement on respiratory muscle testing. *Am J Respir Crit Care Med*. 2002;166 (4) :518-624.
52. Garcia-Rio F, Calle M, Burgos F, Casan P, Del CF, Galdiz JB, et al. Spirometry. Spanish Society of Pulmonology and Thoracic Surgery (SEPAR) . *Arch Bronconeumol*. 2013;49 (9) :388-401.
53. Farrero E, Anton A, Egea CJ, Almaraz MJ, Masa JF, Utrabo I, et al. Guidelines for the management of respiratory complications in patients with neuromuscular disease. Sociedad Espanola de Neumologia y Cirugia Toracica (SEPAR) . *Arch Bronconeumol*. 2013;49 (7) :306-13.

54. Evans JA, Whitelaw WA. The assessment of maximal respiratory mouth pressures in adults. *Respir Care*. 2009;54 (10) :1348-59.
55. Goswami R, Guleria R, Gupta AK, Gupta N, Marwaha RK, Pande JN, et al. Prevalence of diaphragmatic muscle weakness and dyspnoea in Graves' disease and their reversibility with carbimazole therapy. *Eur J Endocrinol*. 2002;147 (3) :299-303.
56. Keenan SP, Alexander D, Road JD, Ryan CF, Oger J, Wilcox PG. Ventilatory muscle strength and endurance in myasthenia gravis. *Eur Respir J*. 1995;8 (7) :1130-5.
57. Nava S, Ambrosino N, Crotti P, Fracchia C, Rampulla C. Recruitment of some respiratory muscles during three maximal inspiratory manoeuvres. *Thorax*. 1993;48 (7) :702-7.
58. Aldrich TK, Spiro P. Maximal inspiratory pressure: does reproducibility indicate full effort? *Thorax*. 1995;50 (1) :40-3.
59. Morales P, Sanchis J, Cordero PJ, Diez JL. [Maximum static respiratory pressures in adults. The reference values for a Mediterranean Caucasian population]. *Arch Bronconeumol*. 1997;33 (5) :213-9.
60. Steier J, Kaul S, Seymour J, Jolley C, Rafferty G, Man W, et al. The value of multiple tests of respiratory muscle strength. *Thorax*. 2007;62 (11) :975-80.
61. Martinez-Llorens J, Ausin P, Roig A, Balana A, Admetllo M, Munoz L, et al. Nasal inspiratory pressure: an alternative for the assessment of inspiratory muscle strength? *Arch Bronconeumol*. 2011;47 (4) :169-75.
62. Heritier F, Rahm F, Pasche P, Fitting JW. Sniff nasal inspiratory pressure. A noninvasive assessment of inspiratory muscle strength. *Am J Respir Crit Care Med*. 1994;150 (6 Pt 1) :1678-83.
63. Koulouris N, Vianna LG, Mulvey DA, Green M, Moxham J. Maximal relaxation rates of esophageal, nose, and mouth pressures during a sniff reflect inspiratory muscle fatigue. *Am Rev Respir Dis*. 1989;139 (5) :1213-7.

64. Lofaso F, Nicot F, Lejaille M, Falaize L, Louis A, Clement A, et al. Sniff nasal inspiratory pressure: what is the optimal number of sniffs? *Eur Respir J*. 2006;27 (5) :980-2.
65. Laroche CM, Carroll N, Moxham J, Green M. Clinical significance of severe isolated diaphragm weakness. *Am Rev Respir Dis*. 1988;138 (4) :862-6.
66. Collett PW, Perry C, Engel LA. Pressure-time product, flow, and oxygen cost of resistive breathing in humans. *J Appl Physiol* (1985) . 1985;58 (4) :1263-72.
67. Field S, Sanci S, Grassino A. Respiratory muscle oxygen consumption estimated by the diaphragm pressure-time index. *J Appl Physiol Respir Environ Exerc Physiol*. 1984;57 (1) :44-51.
68. Bai TR, Rabinovitch BJ, Pardy RL. Near-maximal voluntary hyperpnea and ventilatory muscle function. *J Appl Physiol Respir Environ Exerc Physiol*. 1984;57 (6) :1742-8.
69. Mancini DM, Henson D, LaManca J, Levine S. Evidence of reduced respiratory muscle endurance in patients with heart failure. *J Am Coll Cardiol*. 1994;24 (4) :972-81.
70. Mancini DM, Henson D, La MJ, Donchez L, Levine S. Benefit of selective respiratory muscle training on exercise capacity in patients with chronic congestive heart failure. *Circulation*. 1995;91 (2) :320-9.
71. Gandevia SC, McKenzie DK, Neering IR. Endurance properties of respiratory and limb muscles. *Respir Physiol*. 1983;53 (1) :47-61.
72. Martyn JB, Moreno RH, Pare PD, Pardy RL. Measurement of inspiratory muscle performance with incremental threshold loading. *Am Rev Respir Dis*. 1987;135 (4) :919-23.
73. McElvaney G, Fairbairn MS, Wilcox PG, Pardy RL. Comparison of two-minute incremental threshold loading and maximal loading as measures of respiratory muscle endurance. *Chest*. 1989;96 (3) :557-63.
74. McKenzie DK, Gandevia SC. Strength and endurance of inspiratory, expiratory, and limb muscles in asthma. *Am Rev Respir Dis*. 1986;134 (5) :999-1004.

75. Nickerson BG, Keens TG. Measuring ventilatory muscle endurance in humans as sustainable inspiratory pressure. *J Appl Physiol Respir Environ Exerc Physiol.* 1982;52 (3) :768-72.
76. Gosselink R, Troosters T, Decramer M. Peripheral muscle weakness contributes to exercise limitation in COPD. *Am J Respir Crit Care Med.* 1996;153 (3) :976-80.
77. Hamilton AL, Killian KJ, Summers E, Jones NL. Muscle strength, symptom intensity, and exercise capacity in patients with cardiorespiratory disorders. *Am J Respir Crit Care Med.* 1995;152 (6 Pt 1) :2021-31.
78. Man WD, Soliman MG, Gearing J, Radford SG, Rafferty GF, Gray BJ, et al. Symptoms and quadriceps fatigability after walking and cycling in chronic obstructive pulmonary disease. *Am J Respir Crit Care Med.* 2003;168 (5) :562-7.
79. Mostert R, Goris A, Weling-Scheepers C, Wouters EF, Schols AM. Tissue depletion and health related quality of life in patients with chronic obstructive pulmonary disease. *Respir Med.* 2000;94 (9) :859-67.
80. Vilaro J, Ramirez-Sarmiento A, Martinez-Llorens JM, Mendoza T, Alvarez M, Sanchez-Cayado N, et al. Global muscle dysfunction as a risk factor of readmission to hospital due to COPD exacerbations. *Respir Med.* 2010;104 (12) :1896-902.
81. Cattrysse E, Zinzen E, Caboor D, Duquet W, Van RP, Clarys JP. Anthropometric fractionation of body mass: Matiegka revisited. *J Sports Sci.* 2002;20 (9) :717-23.
82. Schols AM, Wouters EF, Soeters PB, Westerterp KR. Body composition by bioelectrical-impedance analysis compared with deuterium dilution and skinfold anthropometry in patients with chronic obstructive pulmonary disease. *Am J Clin Nutr.* 1991;53 (2) :421-4.
83. Lukaski HC, Johnson PE, Bolonchuk WW, Lykken GI. Assessment of fat-free mass using bioelectrical impedance measurements of the human body. *Am J Clin Nutr.* 1985;41 (4) :810-7.



84. Rutten EP, Spruit MA, Wouters EF. Critical view on diagnosing muscle wasting by single-frequency bio-electrical impedance in COPD. *Respir Med.* 2010;104 (1) :91-8.
85. Kim J, Wang Z, Heymsfield SB, Baumgartner RN, Gallagher D. Total-body skeletal muscle mass: estimation by a new dual-energy X-ray absorptiometry method. *Am J Clin Nutr.* 2002;76 (2) :378-83.
86. Engelen MP, Schols AM, Heidendal GA, Wouters EF. Dual-energy X-ray absorptiometry in the clinical evaluation of body composition and bone mineral density in patients with chronic obstructive pulmonary disease. *Am J Clin Nutr.* 1998;68 (6) :1298-303.
87. Hayot M, Michaud A, Koechlin C, Caron MA, LeBlanc P, Prefaut C, et al. Skeletal muscle microbiopsy: a validation study of a minimally invasive technique. *Eur Respir J.* 2005;25 (3) :431-40.
88. Marquis K, Debigare R, Lacasse Y, LeBlanc P, Jobin J, Carrier G, et al. Midthigh muscle cross-sectional area is a better predictor of mortality than body mass index in patients with chronic obstructive pulmonary disease. *Am J Respir Crit Care Med.* 2002;166 (6) :809-13.
89. Mathur S, Takai KP, Macintyre DL, Reid D. Estimation of thigh muscle mass with magnetic resonance imaging in older adults and people with chronic obstructive pulmonary disease. *Phys Ther.* 2008;88 (2) :219-30.
90. Seymour JM, Ward K, Sidhu PS, Puthuchear Z, Steier J, Jolley CJ, et al. Ultrasound measurement of rectus femoris cross-sectional area and the relationship with quadriceps strength in COPD. *Thorax.* 2009;64 (5) :418-23.
91. Coggan AR. Muscle biopsy as a tool in the study of aging. *J Gerontol A Biol Sci Med Sci.* 1995;50 Spec No:30-4.
92. Zwerink M, van der Palen J, van d, V, Brusse-Keizer M, Effing T. Relationship between daily physical activity and exercise capacity in patients with COPD. *Respir Med.* 2013;107 (2) :242-8.

93. Pitta F, Troosters T, Probst VS, Spruit MA, Decramer M, Gosselink R.  
Quantifying physical activity in daily life with questionnaires and motion sensors in COPD. *Eur Respir J*. 2006;27 (5) :1040-55.
94. Garcia-Rio F, Rojo B, Casitas R, Lores V, Madero R, Romero D, et al.  
Prognostic value of the objective measurement of daily physical activity in patients with COPD. *Chest*. 2012;142 (2) :338-46.
95. Lenman J.A.R. *Clinical neurophysiology*. Oxford: Blackwell Scientific Publications; 1975.
96. Walton J.N. *Disorders of the voluntary muscle*. Fourth ed. Edimburg: Curchil Livingstone; 1980.
97. Roussos C, Aubier M. Neural drive and electromechanical alterations in the fatiguing diaphragm. *Human Muscle Fatigue: Physiological Mechanisms*. Ciba Foundation Symposium 82 ed. Pitman Medical London; 1981.
98. Yoon Y, Mansour J, Simon S.R. Muscle activities during gait. *Orthop Trans*. 1981;5:229-31.
99. Puhan MA, Siebeling L, Zoller M, Muggensturm P, ter RG. Simple functional performance tests and mortality in COPD. *Eur Respir J*. 2013;42 (4) :956-63.
100. Roberts HC, Denison HJ, Martin HJ, Patel HP, Syddall H, Cooper C, et al. A review of the measurement of grip strength in clinical and epidemiological studies: towards a standardised approach. *Age Ageing*. 2011;40 (4) :423-9.
101. Spruit MA, Sillen MJ, Groenen MT, Wouters EF, Franssen FM. New normative values for handgrip strength: results from the UK Biobank. *J Am Med Dir Assoc*. 2013;14 (10) :775-11.
102. Luna-Heredia E, Martin-Pena G, Ruiz-Galiana J. Handgrip dynamometry in healthy adults. *Clin Nutr*. 2005;24 (2) :250-8.
103. Edwards RH, Young A, Hosking GP, Jones DA. Human skeletal muscle function: description of tests and normal values. *Clin Sci Mol Med*. 1977;52 (3) :283-90.

104. Stevens JE, Binder-Macleod S, Snyder-Mackler L. Characterization of the human quadriceps muscle in active elders. *Arch Phys Med Rehabil.* 2001;82 (7) :973-8.
105. Vieira L, Bottaro M, Celes R, Viegas CA, Silva CA. Isokinetic muscle evaluation of quadriceps in patients with chronic obstructive pulmonary disease. *Rev Port Pneumol.* 2010;16 (5) :717-36.
106. Malaguti C, Napolis LM, Villaca D, Neder JA, Nery LE, Dal CS. Relationship between peripheral muscle structure and function in patients with chronic obstructive pulmonary disease with different nutritional status. *J Strength Cond Res.* 2011;25 (7) :1795-803.
107. Polkey MI, Kyroussis D, Hamnegard CH, Mills GH, Green M, Moxham J. Quadriceps strength and fatigue assessed by magnetic stimulation of the femoral nerve in man. *Muscle Nerve.* 1996;19 (5) :549-55.
108. Man WD, Soliman MG, Nikolettou D, Harris ML, Rafferty GF, Mustfa N, et al. Non-volitional assessment of skeletal muscle strength in patients with chronic obstructive pulmonary disease. *Thorax.* 2003;58 (8) :665-9.
109. ATS statement: guidelines for the six-minute walk test. *Am J Respir Crit Care Med.* 2002;166 (1) :111-7.
110. Wasserman K, Hansen J.E, Sue D.Y, Stringer W.W, Whipp B.J, Sietsema K.E, et al. Principles of exercise testing and interpretation. Fifth ed. Philadelphia: 2012.
111. Weisman IM, Zeballos RJ. An integrated approach to the interpretation of cardiopulmonary exercise testing. *Clin Chest Med.* 1994;15 (2) :421-45.
112. Fletcher GF, Balady G, Froelicher VF, Hartley LH, Haskell WL, Pollock ML. Exercise standards. A statement for healthcare professionals from the American Heart Association. Writing Group. *Circulation.* 1995;91 (2) :580-615.
113. Pina IL, Balady GJ, Hanson P, Labovitz AJ, Madonna DW, Myers J. Guidelines for clinical exercise testing laboratories. A statement for healthcare professionals from the Committee on Exercise and Cardiac Rehabilitation, American Heart Association. *Circulation.* 1995;91 (3) :912-21.

114. Hernandez NA, Wouters EF, Meijer K, Annegarn J, Pitta F, Spruit MA. Reproducibility of 6-minute walking test in patients with COPD. *Eur Respir J*. 2011;38 (2) :261-7.
115. Casanova C, Cote C, Marin JM, Pinto-Plata V, de Torres JP, Aguirre-Jaime A, et al. Distance and oxygen desaturation during the 6-min walk test as predictors of long-term mortality in patients with COPD. *Chest*. 2008;134 (4) :746-52.
116. Forman DE, Fleg JL, Kitzman DW, Brawner CA, Swank AM, McKelvie RS, et al. 6-min walk test provides prognostic utility comparable to cardiopulmonary exercise testing in ambulatory outpatients with systolic heart failure. *J Am Coll Cardiol*. 2012;60 (25) :2653-61.
117. Garcia-Rio F, Lores V, Mediano O, Rojo B, Hernanz A, Lopez-Collazo E, et al. Daily physical activity in patients with chronic obstructive pulmonary disease is mainly associated with dynamic hyperinflation. *Am J Respir Crit Care Med*. 2009;180 (6) :506-12.
118. Hasin T, Topilsky Y, Kremers WK, Boilson BA, Schirger JA, Edwards BS, et al. Usefulness of the six-minute walk test after continuous axial flow left ventricular device implantation to predict survival. *Am J Cardiol*. 2012;110 (9) :1322-8.
119. Pinto-Plata VM, Cote C, Cabral H, Taylor J, Celli BR. The 6-min walk distance: change over time and value as a predictor of survival in severe COPD. *Eur Respir J*. 2004;23 (1) :28-33.
120. Swigris JJ, Wamboldt FS, Behr J, du Bois RM, King TE, Raghu G, et al. The 6 minute walk in idiopathic pulmonary fibrosis: longitudinal changes and minimum important difference. *Thorax*. 2010;65 (2) :173-7.
121. Casas A, Vilaro J, Rabinovich R, Mayer A, Barbera JA, Rodriguez-Roisin R, et al. Encouraged 6-min walking test indicates maximum sustainable exercise in COPD patients. *Chest*. 2005;128 (1) :55-61.
122. Blanco I, Villaquiran C, Valera JL, Molina-Molina M, Xaubet A, Rodriguez-Roisin R, et al. [Peak oxygen uptake during the six-minute walk test in diffuse interstitial lung disease and pulmonary hypertension]. *Arch Bronconeumol*. 2010;46 (3) :122-8.

123. Neder JA, Jones PW, Nery LE, Whipp BJ. Determinants of the exercise endurance capacity in patients with chronic obstructive pulmonary disease. The power-duration relationship. *Am J Respir Crit Care Med*. 2000;162 (2 Pt 1) :497-504.
124. Holland AE, Hill CJ, Rasekaba T, Lee A, Naughton MT, McDonald CF. Updating the minimal important difference for six-minute walk distance in patients with chronic obstructive pulmonary disease. *Arch Phys Med Rehabil*. 2010;91 (2) :221-5.
125. Keyser RE, Woolstenhulme JG, Chin LM, Nathan SD, Weir NA, Connors G, et al. Cardiorespiratory function before and after aerobic exercise training in patients with interstitial lung disease. *J Cardiopulm Rehabil Prev*. 2015;35 (1) :47-55.
126. Mainguy V, Malenfant S, Neyron AS, Saey D, Maltais F, Bonnet S, et al. Alternatives to the six-minute walk test in pulmonary arterial hypertension. *PLoS One*. 2014;9 (8) :e103626.
127. Polkey MI, Spruit MA, Edwards LD, Watkins ML, Pinto-Plata V, Vestbo J, et al. Six-minute-walk test in chronic obstructive pulmonary disease: minimal clinically important difference for death or hospitalization. *Am J Respir Crit Care Med*. 2013;187 (4) :382-6.
128. Puhan MA, Chandra D, Mosenifar Z, Ries A, Make B, Hansel NN, et al. The minimal important difference of exercise tests in severe COPD. *Eur Respir J*. 2011;37 (4) :784-90.
129. Rastogi D, Khan UI, Isasi CR, Coupey SM. Associations of obesity and asthma with functional exercise capacity in urban minority adolescents. *Pediatr Pulmonol*. 2012;47 (11) :1061-9.
130. Tabata M, Shimizu R, Kamekawa D, Kato M, Kamiya K, Akiyama A, et al. Six-minute walk distance is an independent predictor of hospital readmission in patients with chronic heart failure. *Int Heart J*. 2014;55 (4) :331-6.
131. Holland AE, Nici L. The return of the minimum clinically important difference for 6-minute-walk distance in chronic obstructive pulmonary disease. *Am J Respir Crit Care Med*. 2013;187 (4) :335-6.

132. Enright PL, Sherrill DL. Reference equations for the six-minute walk in healthy adults. *Am J Respir Crit Care Med*. 1998;158 (5 Pt 1) :1384-7.
133. ATS/ACCP Statement on cardiopulmonary exercise testing. *Am J Respir Crit Care Med*. 2003;167 (2) :211-77.
134. Andrianopoulos V, Wagers SS, Groenen MT, Vanfleteren LE, Franssen FM, Smeenk FW, et al. Characteristics and determinants of endurance cycle ergometry and six-minute walk distance in patients with COPD. *BMC Pulm Med*. 2014;14:97.
135. Guazzi M, Adams V, Conraads V, Halle M, Mezzani A, Vanhees L, et al. EACPR/AHA Scientific Statement. Clinical recommendations for cardiopulmonary exercise testing data assessment in specific patient populations. *Circulation*. 2012;126 (18) :2261-74.
136. Palange P, Ward SA, Carlsen KH, Casaburi R, Gallagher CG, Gosselink R, et al. Recommendations on the use of exercise testing in clinical practice. *Eur Respir J*. 2007;29 (1) :185-209.
137. Carter R, Riantawan P, Banham SW, Sturrock RD. An investigation of factors limiting aerobic capacity in patients with ankylosing spondylitis. *Respir Med*. 1999;93 (10) :700-8.
138. Eschenbacher WL, Mannina A. An algorithm for the interpretation of cardiopulmonary exercise tests. *Chest*. 1990;97 (2) :263-7.
139. Ganju AA, Fuladi AB, Tayade BO, Ganju NA. Cardiopulmonary exercise testing in evaluation of patients of chronic obstructive pulmonary disease. *Indian J Chest Dis Allied Sci*. 2011;53 (2) :87-91.
140. McNicholl DM, Megarry J, McGarvey LP, Riley MS, Heaney LG. The utility of cardiopulmonary exercise testing in difficult asthma. *Chest*. 2011;139 (5) :1117-23.
141. Medinger AE, Chan TW, Arabian A, Rohatgi PK. Interpretive algorithms for the symptom-limited exercise test: assessing dyspnea in Persian Gulf war veterans. *Chest*. 1998;113 (3) :612-8.

142. Messner-Pellenc P, Ximenes C, Brasileiro CF, Mercier J, Grolleau R, Prefaut CG. Cardiopulmonary exercise testing. Determinants of dyspnea due to cardiac or pulmonary limitation. *Chest*. 1994;106 (2) :354-60.
143. Plankeel JF, McMullen B, MacIntyre NR. Exercise outcomes after pulmonary rehabilitation depend on the initial mechanism of exercise limitation among non-oxygen-dependent COPD patients. *Chest*. 2005;127 (1) :110-6.
144. Sexauer WP, Cheng HK, Fiel SB. Utility of the breathing reserve index at the anaerobic threshold in determining ventilatory-limited exercise in adult cystic fibrosis patients. *Chest*. 2003;124 (4) :1469-75.
145. Fihn SD, Gardin JM, Abrams J, Berra K, Blankenship JC, Dallas AP, et al. 2012 ACCF/AHA/ACP/AATS/PCNA/SCAI/STS Guideline for the diagnosis and management of patients with stable ischemic heart disease: a report of the American College of Cardiology Foundation/American Heart Association Task Force on Practice Guidelines, and the American College of Physicians, American Association for Thoracic Surgery, Preventive Cardiovascular Nurses Association, Society for Cardiovascular Angiography and Interventions, and Society of Thoracic Surgeons. *J Am Coll Cardiol*. 2012;60 (24) :e44-e164.
146. Roca J, Whipp B.J. Clinical exercise testing. First ed. Lausanne: 1997.
147. Hsia D, Casaburi R, Pradhan A, Torres E, Porszasz J. Physiological responses to linear treadmill and cycle ergometer exercise in COPD. *Eur Respir J*. 2009;34 (3) :605-15.
148. Mathur RS, Revill SM, Vara DD, Walton R, Morgan MD. Comparison of peak oxygen consumption during cycle and treadmill exercise in severe chronic obstructive pulmonary disease. *Thorax*. 1995;50 (8) :829-33.
149. Palange P, Forte S, Onorati P, Manfredi F, Serra P, Carlone S. Ventilatory and metabolic adaptations to walking and cycling in patients with COPD. *J Appl Physiol* (1985) . 2000;88 (5) :1715-20.
150. Casaburi R, Patessio A, Ioli F, Zanaboni S, Donner CF, Wasserman K. Reductions in exercise lactic acidosis and ventilation as a result of exercise training in patients with obstructive lung disease. *Am Rev Respir Dis*. 1991;143 (1) :9-18.

151. Puente-Maestu L, Sanz ML, Sanz P, Cubillo JM, Mayol J, Casaburi R. Comparison of effects of supervised versus self-monitored training programmes in patients with chronic obstructive pulmonary disease. *Eur Respir J*. 2000;15 (3) :517-25.
152. Arnett SW, Laity JH, Agrawal SK, Cress ME. Aerobic reserve and physical functional performance in older adults. *Age Ageing*. 2008;37 (4) :384-9.
153. Berg-Emons R, Balk A, Bussmann H, Stam H. Does aerobic training lead to a more active lifestyle and improved quality of life in patients with chronic heart failure? *Eur J Heart Fail*. 2004;6 (1) :95-100.
154. Boutou AK, Pitsiou GG, Trigonis I, Papakosta D, Kontou PK, Chavouzis N, et al. Exercise capacity in idiopathic pulmonary fibrosis: the effect of pulmonary hypertension. *Respirology*. 2011;16 (3) :451-8.
155. Cotes JE. The ventilatory cost of activity. *Br J Ind Med*. 1975;32 (3) :220-3.
156. Didier JP, Mourey F, Brondel L, Marcer I, Milan C, Casillas JM, et al. The energetic cost of some daily activities: a comparison in a young and old population. *Age Ageing*. 1993;22 (2) :90-6.
157. Kato DJ, Rodgers WM, Stickland MK, Haennel RG. Impact of peak oxygen uptake and muscular fitness on the performance of activities of daily living in patients with chronic obstructive pulmonary disease. *J Cardiopulm Rehabil Prev*. 2012;32 (6) :400-4.
158. Myers J, Bader D, Madhavan R, Froelicher V. Validation of a specific activity questionnaire to estimate exercise tolerance in patients referred for exercise testing. *Am Heart J*. 2001;142 (6) :1041-6.
159. Ruiz de Ona Lacasta JM, Puente ML, Rodriguez Hermosa JL, Tatay ME, Cubillo Marcos JM. [A comparison of several measurement scales for assessing dyspnea in their daily activities in patients with chronic obstructive lung disease]. *Arch Bronconeumol*. 2000;36 (1) :25-8.
160. Vaes AW, Wouters EF, Franssen FM, Uszko-Lencer NH, Stakenborg KH, Westra M, et al. Task-related oxygen uptake during domestic activities of daily



life in patients with COPD and healthy elderly subjects. *Chest*. 2011;140 (4) :970-9.

161. Velloso M, Stella SG, Cendon S, Silva AC, Jardim JR. Metabolic and ventilatory parameters of four activities of daily living accomplished with arms in COPD patients. *Chest*. 2003;123 (4) :1047-53.
162. Velloso M, Jardim JR. Study of energy expenditure during activities of daily living using and not using body position recommended by energy conservation techniques in patients with COPD. *Chest*. 2006;130 (1) :126-32.
163. Hansen JE, Sun XG, Yasunobu Y, Garafano RP, Gates G, Barst RJ, et al. Reproducibility of cardiopulmonary exercise measurements in patients with pulmonary arterial hypertension. *Chest*. 2004;126 (3) :816-24.
164. McKone EF, Barry SC, FitzGerald MX, Gallagher CG. Reproducibility of maximal exercise ergometer testing in patients with cystic fibrosis. *Chest*. 1999;116 (2) :363-8.
165. Nosedá A, Carpioux JP, Prigogine T, Schmerber J. Lung function, maximum and submaximum exercise testing in COPD patients: reproducibility over a long interval. *Lung*. 1989;167 (4) :247-57.
166. Keteyian SJ, Brawner CA, Ehrman JK, Ivanhoe R, Boehmer JP, Abraham WT. Reproducibility of peak oxygen uptake and other cardiopulmonary exercise parameters: implications for clinical trials and clinical practice. *Chest*. 2010;138 (4) :950-5.
167. O'Donnell DE, Travers J, Webb KA, He Z, Lam YM, Hamilton A, et al. Reliability of ventilatory parameters during cycle ergometry in multicentre trials in COPD. *Eur Respir J*. 2009;34 (4) :866-74.
168. Davies EJ, Moxham T, Rees K, Singh S, Coats AJ, Ebrahim S, et al. Exercise based rehabilitation for heart failure. *Cochrane Database Syst Rev*. 2010; (4) :CD003331.
169. Myers J, Prakash M, Froelicher V, Do D, Partington S, Atwood JE. Exercise capacity and mortality among men referred for exercise testing. *N Engl J Med*. 2002;346 (11) :793-801.

170. Chan L, Chin LM, Kennedy M, Woolstenhulme JG, Nathan SD, Weinstein AA, et al. Benefits of intensive treadmill exercise training on cardiorespiratory function and quality of life in patients with pulmonary hypertension. *Chest*. 2013;143 (2) :333-43.
171. de JW, Grevink RG, Roorda RJ, Kaptein AA, van der Schans CP. Effect of a home exercise training program in patients with cystic fibrosis. *Chest*. 1994;105 (2) :463-8.
172. Neder JA, Nery LE, Silva AC, Cabral AL, Fernandes AL. Short-term effects of aerobic training in the clinical management of moderate to severe asthma in children. *Thorax*. 1999;54 (3) :202-6.
173. Puente-Maestu L, SantaCruz A, Vargas T, Martinez-Abad Y, Whipp BJ. Effects of training on the tolerance to high-intensity exercise in patients with severe COPD. *Respiration*. 2003;70 (4) :367-70.
174. Burtin C, Saey D, Saglam M, Langer D, Gosselink R, Janssens W, et al. Effectiveness of exercise training in patients with COPD: the role of muscle fatigue. *Eur Respir J*. 2012;40 (2) :338-44.
175. Bouchard C. Genomic predictors of trainability. *Exp Physiol*. 2012;97 (3) :347-52.
176. Benzo RP, Paramesh S, Patel SA, Slivka WA, Sciurba FC. Optimal protocol selection for cardiopulmonary exercise testing in severe COPD. *Chest*. 2007;132 (5) :1500-5.
177. Lacasse Y, Wong E, Guyatt GH, King D, Cook DJ, Goldstein RS. Meta-analysis of respiratory rehabilitation in chronic obstructive pulmonary disease. *Lancet*. 1996;348 (9035) :1115-9.
178. Sutherland ER, Make BJ. Maximum exercise as an outcome in COPD: minimal clinically important difference. *COPD*. 2005;2 (1) :137-41.
179. van d, V, Murgatroyd SR, Rossiter HB, Chen C, Casaburi R, Porszasz J. Selecting constant work rates for endurance testing in COPD: the role of the power-duration relationship. *COPD*. 2014;11 (3) :267-76.

180. Blanco I, Santos S, Gea J, Guell R, Torres F, Gimeno-Santos E, et al. Sildenafil to improve respiratory rehabilitation outcomes in COPD: a controlled trial. *Eur Respir J*. 2013;42 (4) :982-92.
181. Cambach W, Chadwick-Straver RV, Wagenaar RC, van Keimpema AR, Kemper HC. The effects of a community-based pulmonary rehabilitation programme on exercise tolerance and quality of life: a randomized controlled trial. *Eur Respir J*. 1997;10 (1) :104-13.
182. Hawkins P, Johnson LC, Nikolettou D, Hamnegard CH, Sherwood R, Polkey MI, et al. Proportional assist ventilation as an aid to exercise training in severe chronic obstructive pulmonary disease. *Thorax*. 2002;57 (10) :853-9.
183. Laviolette L, Bourbeau J, Bernard S, Lacasse Y, Pepin V, Breton MJ, et al. Assessing the impact of pulmonary rehabilitation on functional status in COPD. *Thorax*. 2008;63 (2) :115-21.
184. O'Donnell DE, McGuire M, Samis L, Webb KA. General exercise training improves ventilatory and peripheral muscle strength and endurance in chronic airflow limitation. *Am J Respir Crit Care Med*. 1998;157 (5 Pt 1) :1489-97.
185. Ong KC, Chong WF, Soh C, Earnest A. Comparison of different exercise tests in assessing outcomes of pulmonary rehabilitation. *Respir Care*. 2004;49 (12) :1498-503.
186. Porszasz J, Emtner M, Goto S, Somfay A, Whipp BJ, Casaburi R. Exercise training decreases ventilatory requirements and exercise-induced hyperinflation at submaximal intensities in patients with COPD. *Chest*. 2005;128 (4) :2025-34.
187. Puente-Maestu L, Abad YM, Pedraza F, Sanchez G, Stringer WW. A controlled trial of the effects of leg training on breathing pattern and dynamic hyperinflation in severe COPD. *Lung*. 2006;184 (3) :159-67.
188. van 't HA, Gosselink R, Hollander P, Postmus P, Kwakkel G. Training with inspiratory pressure support in patients with severe COPD. *Eur Respir J*. 2006;27 (1) :65-72.

189. Puente-Maestu L, Villar F, de MJ, Stringer WW, Sanz P, Sanz ML, et al. Clinical relevance of constant power exercise duration changes in COPD. *Eur Respir J*. 2009;34 (2) :340-5.
190. Oga T, Nishimura K, Tsukino M, Hajiro T, Ikeda A, Izumi T. The effects of oxitropium bromide on exercise performance in patients with stable chronic obstructive pulmonary disease. A comparison of three different exercise tests. *Am J Respir Crit Care Med*. 2000;161 (6) :1897-901.
191. O'Donnell DE, Fluge T, Gerken F, Hamilton A, Webb K, Aguilaniu B, et al. Effects of tiotropium on lung hyperinflation, dyspnoea and exercise tolerance in COPD. *Eur Respir J*. 2004;23 (6) :832-40.
192. Spruit MA, Singh SJ, Garvey C, ZuWallack R, Nici L, Rochester C, et al. An official American Thoracic Society/European Respiratory Society statement: key concepts and advances in pulmonary rehabilitation. *Am J Respir Crit Care Med*. 2013;188 (8) :e13-e64.
193. Andrianopoulos V, Klijn P, Franssen FM, Spruit MA. Exercise training in pulmonary rehabilitation. *Clin Chest Med*. 2014;35 (2) :313-22.
194. Guell Rous MR, Diaz LS, Rodriguez TG, Morante VF, San MM, Cejudo P, et al. Pulmonary rehabilitation. *Arch Bronconeumol*. 2014;50 (8) :332-44.
195. Bolton CE, Bevan-Smith EF, Blakey JD, Crowe P, Elkin SL, Garrod R, et al. British Thoracic Society guideline on pulmonary rehabilitation in adults. *Thorax*. 2013;68 Suppl 2:ii1-30.
196. Guell MR, Cejudo P, Rodriguez-Trigo G, Galdiz JB, Casolive V, Regueiro M, et al. Standards for quality care in respiratory rehabilitation in patients with chronic pulmonary disease. Quality Healthcare Committee. Spanish Society of Pneumology and Thoracic Surgery (SEPAR) . *Arch Bronconeumol*. 2012;48 (11) :396-404.
197. Puente-Maestu L, Tena T, Trascasa C, Perez-Parra J, Godoy R, Garcia MJ, et al. Training improves muscle oxidative capacity and oxygenation recovery kinetics in patients with chronic obstructive pulmonary disease. *Eur J Appl Physiol*. 2003;88 (6) :580-7.

198. Vogiatzis I, Terzis G, Stratakos G, Cherouveim E, Athanasopoulos D, Spetsioti S, et al. Effect of pulmonary rehabilitation on peripheral muscle fiber remodeling in patients with COPD in GOLD stages II to IV. *Chest*. 2011;140 (3) :744-52.
199. Vogiatzis I, Terzis G, Nanas S, Stratakos G, Simoes DC, Georgiadou O, et al. Skeletal muscle adaptations to interval training in patients with advanced COPD. *Chest*. 2005;128 (6) :3838-45.
200. Spruit MA, Pitta F, Garvey C, ZuWallack RL, Roberts CM, Collins EG, et al. Differences in content and organisational aspects of pulmonary rehabilitation programmes. *Eur Respir J*. 2014;43 (5) :1326-37.
201. Troosters T, Hornikx M, Demeyer H, Camillo CA, Janssens W. Pulmonary rehabilitation: timing, location, and duration. *Clin Chest Med*. 2014;35 (2) :303-11.
202. Beauchamp MK, Janaudis-Ferreira T, Goldstein RS, Brooks D. Optimal duration of pulmonary rehabilitation for individuals with chronic obstructive pulmonary disease - a systematic review. *Chron Respir Dis*. 2011;8 (2) :129-40.
203. Beauchamp MK, Nonoyama M, Goldstein RS, Hill K, Dolmage TE, Mathur S, et al. Interval versus continuous training in individuals with chronic obstructive pulmonary disease--a systematic review. *Thorax*. 2010;65 (2) :157-64.
204. Vogiatzis I, Nanas S, Roussos C. Interval training as an alternative modality to continuous exercise in patients with COPD. *Eur Respir J*. 2002;20 (1) :12-9.
205. Ortega F, Toral J, Cejudo P, Villagomez R, Sanchez H, Castillo J, et al. Comparison of effects of strength and endurance training in patients with chronic obstructive pulmonary disease. *Am J Respir Crit Care Med*. 2002;166 (5) :669-74.
206. O'Shea SD, Taylor NF, Paratz JD. Progressive resistance exercise improves muscle strength and may improve elements of performance of daily activities for people with COPD: a systematic review. *Chest*. 2009;136 (5) :1269-83.

207. Probst VS, Troosters T, Pitta F, Decramer M, Gosselink R. Cardiopulmonary stress during exercise training in patients with COPD. *Eur Respir J*. 2006;27 (6) :1110-8.
208. Dolmage TE, Goldstein RS. Effects of one-legged exercise training of patients with COPD. *Chest*. 2008;133 (2) :370-6.
209. Rocha Vieira DS, Baril J, Richard R, Perrault H, Bourbeau J, Taivassalo T. Eccentric cycle exercise in severe COPD: feasibility of application. *COPD*. 2011;8 (4) :270-4.
210. Sillen MJ, Franssen FM, Gosker HR, Wouters EF, Spruit MA. Metabolic and structural changes in lower-limb skeletal muscle following neuromuscular electrical stimulation: a systematic review. *PLoS One*. 2013;8 (9) :e69391.
211. Sillen MJ, Franssen FM, Delbressine JM, Vaes AW, Wouters EF, Spruit MA. Efficacy of lower-limb muscle training modalities in severely dyspnoeic individuals with COPD and quadriceps muscle weakness: results from the DICES trial. *Thorax*. 2014;69 (6) :525-31.
212. Bustamante V, Lopez de Santa ME, Gorostiza A, Jimenez U, Galdiz JB. Muscle training with repetitive magnetic stimulation of the quadriceps in severe COPD patients. *Respir Med*. 2010;104 (2) :237-45.
213. Gosselink R, De VJ, van den Heuvel SP, Segers J, Decramer M, Kwakkel G. Impact of inspiratory muscle training in patients with COPD: what is the evidence? *Eur Respir J*. 2011;37 (2) :416-25.
214. Laveneziana P, Palange P. Physical activity, nutritional status and systemic inflammation in COPD. *Eur Respir J*. 2012;40 (3) :522-9.
215. Raguso CA, Luthy C. Nutritional status in chronic obstructive pulmonary disease: role of hypoxia. *Nutrition*. 2011;27 (2) :138-43.
216. Vermeeren MA, Creutzberg EC, Schols AM, Postma DS, Pieters WR, Roldaan AC, et al. Prevalence of nutritional depletion in a large out-patient population of patients with COPD. *Respir Med*. 2006;100 (8) :1349-55.

217. Schols AM, Slangen J, Volovics L, Wouters EF. Weight loss is a reversible factor in the prognosis of chronic obstructive pulmonary disease. *Am J Respir Crit Care Med*. 1998;157 (6 Pt 1) :1791-7.
218. Ferreira IM, Brooks D, White J, Goldstein R. Nutritional supplementation for stable chronic obstructive pulmonary disease. *Cochrane Database Syst Rev*. 2012;12:CD000998.
219. Ali T, Bennoor K.S, Begum N. Effects of nutritional modification on anthropometry and lung functions of COPD patients. *Chest*. 2007;132 (4) :532-8.
220. Efthimiou J, Fleming J, Gomes C, Spiro SG. The effect of supplementary oral nutrition in poorly nourished patients with chronic obstructive pulmonary disease. *Am Rev Respir Dis*. 1988;137 (5) :1075-82.
221. Fuenzalida CE, Petty TL, Jones ML, Jarrett S, Harbeck RJ, Terry RW, et al. The immune response to short-term nutritional intervention in advanced chronic obstructive pulmonary disease. *Am Rev Respir Dis*. 1990;142 (1) :49-56.
222. Goris AH, Vermeeren MA, Wouters EF, Schols AM, Westerterp KR. Energy balance in depleted ambulatory patients with chronic obstructive pulmonary disease: the effect of physical activity and oral nutritional supplementation. *Br J Nutr*. 2003;89 (5) :725-31.
223. Hoogendoorn M, van Wetering CR, Schols AM, Rutten-van Molken MP. Is INTERdisciplinary COMMunity-based COPD management (INTERCOM) cost-effective? *Eur Respir J*. 2010;35 (1) :79-87.
224. Knowles JB, Fairbairn MS, Wiggs BJ, Chan-Yan C, Pardy RL. Dietary supplementation and respiratory muscle performance in patients with COPD. *Chest*. 1988;93 (5) :977-83.
225. Lewis MI, Belman MJ, Dorr-Uyemura L. Nutritional supplementation in ambulatory patients with chronic obstructive pulmonary disease. *Am Rev Respir Dis*. 1987;135 (5) :1062-8.

226. Otte KE, Ahlburg P, D'Amore F, Stellfeld M. Nutritional repletion in malnourished patients with emphysema. *JPEN J Parenter Enteral Nutr.* 1989;13 (2) :152-6.
227. Rogers RM, Donahoe M, Costantino J. Physiologic effects of oral supplemental feeding in malnourished patients with chronic obstructive pulmonary disease. A randomized control study. *Am Rev Respir Dis.* 1992;146 (6) :1511-7.
228. Schols AM, Soeters PB, Mostert R, Pluymers RJ, Wouters EF. Physiologic effects of nutritional support and anabolic steroids in patients with chronic obstructive pulmonary disease. A placebo-controlled randomized trial. *Am J Respir Crit Care Med.* 1995;152 (4 Pt 1) :1268-74.
229. Steiner MC, Barton RL, Singh SJ, Morgan MD. Nutritional enhancement of exercise performance in chronic obstructive pulmonary disease: a randomised controlled trial. *Thorax.* 2003;58 (9) :745-51.
230. Sugawara K, Takahashi H, Kasai C, Kiyokawa N, Watanabe T, Fujii S, et al. Effects of nutritional supplementation combined with low-intensity exercise in malnourished patients with COPD. *Respir Med.* 2010;104 (12) :1883-9.
231. Sugawara K, Takahashi H, Kashiwagura T, Yamada K, Yanagida S, Homma M, et al. Effect of anti-inflammatory supplementation with whey peptide and exercise therapy in patients with COPD. *Respir Med.* 2012;106 (11) :1526-34.
232. Weekes CE, Emery PW, Elia M. Dietary counselling and food fortification in stable COPD: a randomised trial. *Thorax.* 2009;64 (4) :326-31.
233. Whittaker JS, Ryan CF, Buckley PA, Road JD. The effects of refeeding on peripheral and respiratory muscle function in malnourished chronic obstructive pulmonary disease patients. *Am Rev Respir Dis.* 1990;142 (2) :283-8.
234. Samaras N, Samaras D, Chambellan A, Pichard C, Thibault R. Pulmonary rehabilitation: the reference therapy for undernourished patients with chronic obstructive pulmonary disease. *Biomed Res Int.* 2014;2014:248420.
235. Pan L, Wang M, Xie X, Du C, Guo Y. Effects of anabolic steroids on chronic obstructive pulmonary disease: a meta-analysis of randomised controlled trials. *PLoS One.* 2014;9 (1) :e84855.



236. Burdet L, de MB, Schutz Y, Pichard C, Fitting JW. Administration of growth hormone to underweight patients with chronic obstructive pulmonary disease. A prospective, randomized, controlled study. *Am J Respir Crit Care Med*. 1997;156 (6) :1800-6.
237. Casaburi R, Bhasin S, Cosentino L, Porszasz J, Somfay A, Lewis MI, et al. Effects of testosterone and resistance training in men with chronic obstructive pulmonary disease. *Am J Respir Crit Care Med*. 2004;170 (8) :870-8.
238. Creutzberg EC, Wouters EF, Mostert R, Pluymers RJ, Schols AM. A role for anabolic steroids in the rehabilitation of patients with COPD? A double-blind, placebo-controlled, randomized trial. *Chest*. 2003;124 (5) :1733-42.
239. Ferreira IM, Verreschi IT, Nery LE, Goldstein RS, Zamel N, Brooks D, et al. The influence of 6 months of oral anabolic steroids on body mass and respiratory muscles in undernourished COPD patients. *Chest*. 1998;114 (1) :19-28.
240. Sharma S, Arneja A, McLean L, Duerksen D, Leslie W, Sciberras D, et al. Anabolic steroids in COPD: a review and preliminary results of a randomized trial. *Chron Respir Dis*. 2008;5 (3) :169-76.
241. Svartberg J, Aasebo U, Hjalmsen A, Sundsfjord J, Jorde R. Testosterone treatment improves body composition and sexual function in men with COPD, in a 6-month randomized controlled trial. *Respir Med*. 2004;98 (9) :906-13.
242. Yeh SS, DeGuzman B, Kramer T. Reversal of COPD-associated weight loss using the anabolic agent oxandrolone. *Chest*. 2002;122 (2) :421-8.
243. Pison CM, Cano NJ, Cherion C, Caron F, Court-Fortune, Antonini MT, et al. Multimodal nutritional rehabilitation improves clinical outcomes of malnourished patients with chronic respiratory failure: a randomised controlled trial. *Thorax*. 2011;66 (11) :953-60.
244. Pape GS, Friedman M, Underwood LE, Clemmons DR. The effect of growth hormone on weight gain and pulmonary function in patients with chronic obstructive lung disease. *Chest*. 1991;99 (6) :1495-500.

245. DeBoer MD. Ghrelin and cachexia: will treatment with GHSR-1a agonists make a difference for patients suffering from chronic wasting syndromes? *Mol Cell Endocrinol.* 2011;340 (1) :97-105.
246. Itoh M, Tsuji T, Nemoto K, Nakamura H, Aoshiba K. Undernutrition in patients with COPD and its treatment. *Nutrients.* 2013;5 (4) :1316-35.
247. Nagaya N, Itoh T, Murakami S, Oya H, Uematsu M, Miyatake K, et al. Treatment of cachexia with ghrelin in patients with COPD. *Chest.* 2005;128 (3) :1187-93.
248. Miki K, Maekura R, Nagaya N, Nakazato M, Kimura H, Murakami S, et al. Ghrelin treatment of cachectic patients with chronic obstructive pulmonary disease: a multicenter, randomized, double-blind, placebo-controlled trial. *PLoS One.* 2012;7 (5) :e35708.
249. Miki K, Maekura R, Nagaya N, Kitada S, Miki M, Yoshimura K, et al. Effects of ghrelin treatment on exercise capacity in underweight COPD patients: a substudy of a multicenter, randomized, double-blind, placebo-controlled trial of ghrelin treatment. *BMC Pulm Med.* 2013;13:37.
250. Deacon SJ, Vincent EE, Greenhaff PL, Fox J, Steiner MC, Singh SJ, et al. Randomized controlled trial of dietary creatine as an adjunct therapy to physical training in chronic obstructive pulmonary disease. *Am J Respir Crit Care Med.* 2008;178 (3) :233-9.
251. Fuld JP, Kilduff LP, Neder JA, Pitsiladis Y, Lean ME, Ward SA, et al. Creatine supplementation during pulmonary rehabilitation in chronic obstructive pulmonary disease. *Thorax.* 2005;60 (7) :531-7.
252. Borghi-Silva A, Di TL, Pantoni CB, Mendes RG, Salvini TF, Costa D. Non-invasive ventilation improves peripheral oxygen saturation and reduces fatigability of quadriceps in patients with COPD. *Respirology.* 2009;14 (4) :537-44.
253. Moga AM, de MM, Saey D, Spahija J. Mechanisms of non-pharmacologic adjunct therapies used during exercise in COPD. *Respir Med.* 2012;106 (5) :614-26.



## PIES DE FIGURAS

### Figura 1:

- A) Factores etiológicos involucrados en la disfunción muscular periférica de los pacientes EPOC. Dichos factores ejercen efectos deletéreos en la función y masa muscular de los músculos de las extremidades inferiores, motivo por el que la balanza está totalmente decantada hacia el lado negativo (bandeja izquierda).
- B) En los músculos de las extremidades inferiores, diversos mecanismos biológicos median las acciones de los factores etiológicos, ejerciendo así los efectos deletéreos sobre la función muscular y masa, y la estructura. La balanza está inclinada totalmente hacia el lado izquierdo.

### Figura 2:

- A) En los músculos respiratorios, los factores etiológicos como las alteraciones en la geometría del tórax y la sobrecarga mecánica pueden de alguna manera contrarrestar (efecto entrenamiento, bandeja derecha de la balanza) los efectos deletéreos de los otros factores etiológicos, de naturaleza más sistémica (bandeja izquierda de la balanza), puesto que también contribuyen a la disfunción muscular periférica.
- B) En los músculos respiratorios, diversos mecanismos celulares y moleculares ejercen efectos beneficiosos (mecanismos adaptativos, bandeja derecha de la balanza), responsables de contrarrestar los efectos deletéreos de los otros mecanismos biológicos (bandeja izquierda de la balanza).

**Figure 3:** Listado de pruebas utilizadas más comúnmente en la práctica clínica habitual para evaluar la masa y disfunción muscular de los pacientes. Las pruebas se han clasificado según sean de carácter general o específico para evaluar la masa muscular y su función.

**Figura 4:** Selección de ensayos clínicos controlados que han utilizado PCIA para medir el efecto de intervenciones sobre los músculos de las extremidades inferiores. Potencia: Intensidad a la que se hizo la prueba como porcentaje de la WRmax. Línea vertical. Mínima diferencia clínicamente relevante.

**Tabla 1. Tipos de pruebas de evaluación de la función muscular en sus componentes de fuerza y resistencia.**

| Propiedad Funcional | Grupo Muscular                          | Prueba/Variable                                | Voluntaria | Valores Patológicos                                                                      | Referencias |
|---------------------|-----------------------------------------|------------------------------------------------|------------|------------------------------------------------------------------------------------------|-------------|
| Fuerza              | Inespecífica                            | Espirometría Forzada<br>Pletismografía         | SÍ         | FEV <sub>1</sub> /FVC > 80%<br>TLC < 80% ref                                             | 28,29       |
|                     |                                         | Espirometría Forzada<br>sedestación a decúbito | SÍ         | FVC sedestación normal<br>y <75%ref en decúbito<br><br>Descenso >25%                     | 28,30       |
|                     | Inspiratorios                           | PIM                                            | SÍ         | <80 ref. ó <65%ref.<br>ó sospecha si < -80 cm<br>H <sub>2</sub> O                        | 28,31       |
|                     |                                         | SNIP                                           | SÍ         | Sospecha si:<br>Hombres: < -70 cm H <sub>2</sub> O<br>Mujeres: < -60 cm H <sub>2</sub> O | 28,32,33    |
|                     |                                         | Pesmax                                         | SÍ         | Sospecha si:<br>Hombres: < -80 cm H <sub>2</sub> O<br>Mujeres: < -70 cm H <sub>2</sub> O | 28,34       |
|                     |                                         | Pdimax                                         | SÍ         | Hombres: < -75 cm H <sub>2</sub> O<br>Mujeres: < -50 cm H <sub>2</sub> O                 | 28,35       |
|                     |                                         | Pdimáx <i>Twitch</i>                           | NO         | Hombres: < -60-50 cm<br>H <sub>2</sub> O<br>Mujeres: < -40-35 cm<br>H <sub>2</sub> O     | 28,35       |
|                     |                                         | Espiratorios                                   | SÍ         | <80 ref. ó <65%ref.<br>ó sospecha si <80 cm<br>H <sub>2</sub> O                          | 28,31       |
|                     | Extremidades superiores                 | Presión de mano<br>("handgrip")                | SÍ         | <80% ref.                                                                                | 55,56,57    |
|                     | Extremidades inferiores<br>(cuádriceps) | QCMV                                           | SÍ         | <80% ref.                                                                                | 58,59       |
|                     |                                         | Qtw                                            | NO         | No definido                                                                              | 62,63       |
| Resistencia         | Inespecífica                            | MSV                                            | SÍ         | <60-80% de la VVM                                                                        | 28,36       |
|                     | Inspiratorios                           | PSIM                                           | SÍ         | No definido                                                                              | 37,38       |
|                     |                                         | Tlim inspiratoria                              | SÍ         | No definido                                                                              | 37,38       |
|                     | Espiratorios                            | PSEM                                           | SÍ         | No definido                                                                              | 39,40       |
|                     |                                         | Tlim espiratoria                               | SÍ         | No definido                                                                              | 39,40       |
|                     | Cuádriceps                              | Tlim a % QCMV                                  | SÍ         | No definido                                                                              | 60          |
|                     |                                         | Par de fuerzas ( <i>torque</i> )               | SÍ         | No definido                                                                              | 61          |

**Tabla 2**

**Escala propuesta (John Moxham. Test of respiratory muscle strength. *UptoDate* 2013) para evaluar la colaboración y cooperación del paciente cuando realiza las maniobras de presiones máximas de los músculos respiratorios generadas en boca (PIM y PEM).**

| GRADOS   |                                                                                           |
|----------|-------------------------------------------------------------------------------------------|
| <b>A</b> | Excelente esfuerzo y reproducibilidad (diferencia < 5 cmH <sub>2</sub> O entre maniobras) |
| <b>B</b> | Buen esfuerzo y reproducibilidad (diferencia 5-10 cmH <sub>2</sub> O entre maniobras)     |
| <b>C</b> | Regular esfuerzo y reproducibilidad (diferencia 10-20 cmH <sub>2</sub> O entre maniobras) |
| <b>D</b> | Una sola maniobra buena                                                                   |
| <b>F</b> | Maniobras malas y no reproducibles                                                        |



| <b>TABLA 3</b> <i>Recomendaciones prácticas para el entrenamiento aeróbico y el entrenamiento de fuerza en EPOC</i> |                                                                       |                                                                                                  |
|---------------------------------------------------------------------------------------------------------------------|-----------------------------------------------------------------------|--------------------------------------------------------------------------------------------------|
|                                                                                                                     | <b>Entrenamiento aeróbico/resistencia</b>                             | <b>Entrenamiento de fuerza</b>                                                                   |
| <b>Objetivo</b>                                                                                                     | Mejorar capacidad aeróbica. Mejorar la función musculatura periférica | Sobrecargar grandes masas musculares de MMSS y MMII. Incrementar fuerza y resistencia musculares |
| <b>Frecuencia</b>                                                                                                   | 3-4 días /semana                                                      | 2-3 días /semana                                                                                 |
| <b>Modo</b>                                                                                                         | 20-30 min                                                             | 2-4 series de 6-12 repeticiones                                                                  |
| <b>Intensidad</b>                                                                                                   | 60-80% de la $WR_{max}$                                               | 70-85% del 1RM                                                                                   |
| <b>Duración</b>                                                                                                     | 8-12 semanas                                                          | 8-12 semanas                                                                                     |
